# Supplementary material for: The international tephra research group ‘Commission on Tephrochronology’ and its activities – the first 60 years
Source: Copernicus journal article supplement (doi:10.5194/hgss-2021-22), 2021-12-22
Supplement: Supplementary file [file hgss-2021-22-AC3-supplement.pdf]

## **Global tephra studies: role and importance of the international tephra research group 'Commission on Tephrochronology' in its first 60 years**

### **1 Introduction**

#### 1.1 Tephrochronology and its functioning

*1.1.1 Defining tephrochronology*

*1.1.2 Application of tephrochronology*

*1.1.3 Defining tephtras and cryptotephtras*

*1.1.4 Development of cryptotephra studies and the modern post-1990 era*

#### 1.2 Reviewing 'Commission on Tephrochronology'

### **2 Formation, development, and activities of COT**

#### 2.1 Formation of COT in 1961

#### 2.2 Hosting of commission by INQUA or IAVCEI

#### 2.3 Specialist tephra-centred conferences hosted by COT, and notable outputs

*2.3.1 Tokyo, Japan, 1964*

*2.3.2 Redefining 'tephra' after 1973 INQUA Congress, Christchurch, via Westgate and Gold (1974)*

*2.3.3 Laugarvatn and Reykjavík, Iceland, 1980*

*2.3.4 Mammoth Hot Springs, USA, 1990*

*2.3.5 Tokyo, Japan, 1993*

*2.3.6 Hamilton, New Zealand, 1994*

*2.3.7 Brives-Charenac, France, 1998*

*2.3.8 Dawson City, Canada, 2005*

*2.3.9 Kirishima City, Japan, 2010*

*2.3.10 Moieciu de Sus, Romania, 2018*

#### 2.4 Other activities associated with COT

### **3 Officers and membership, key events and protagonists in COT's development, and post-2007 funding**

#### 3.1 Officers of COT and their roles

#### 3.2 Membership of COT

#### 3.3 Decline and rise of COT since the 1980s: key events and protagonists

*3.3.1 COT transforms to CEV*

*3.3.2 Renaissance from 1987*

*3.3.3 Growth from 1990s: advent of modern cryptotephra studies and development of new techniques*

#### 3.4 Funding acquired by INTAV since 2007 and its expenditure

### **4 Aims of COT, life membership awards, and communication**

#### 4.1 Aims of COT past and present

*4.1.1 Current aims of COT*

#### 4.2 Life membership awards

#### 4.3 Communicating within COT and beyond

### **5 Legacies and future of COT**

#### 5.1 Current projects and future initiatives

*5.1.1 Development of 'best practices' protocols and databases*

*5.1.2 Microbeam trace-element characterization of tephra reference material*

*5.1.3 VOLCORE*

### **6 Discussion and conclusions**

#### **Acknowledgements**

#### **References**

#### **Appendices A and B**
