# Supplementary material for: The international tephra research group ‘Commission on Tephrochronology’ and its activities – the first 60 years
Source: Copernicus journal article supplement (doi:10.5194/hgss-2021-22), 2021-12-22
Supplement: Supplementary file [file hgss-2021-22-RC1-supplement.pdf]

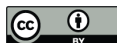

# The international tephra research group ‘Commission on Tephrochronology’ and its activities – the first 60 years

David J. Lowe<sup>1</sup>, Peter M. Abbott<sup>2</sup>, Takehiko Suzuki<sup>3</sup>, and Britta J.L. Jensen<sup>4</sup>

<sup>1</sup>School of Science/Te Aka Mātuatua, University of Waikato, Hamilton, New Zealand

<sup>2</sup>Climate and Environmental Physics, Physics Institute, and Oeschger Centre for Climate Change Research,  
University of Bern, Bern, Switzerland

<sup>3</sup>Department of Geography, Tokyo Metropolitan University, Tokyo, Japan

<sup>4</sup>Department of Earth and Atmospheric Sciences, University of Alberta, Edmonton, Alberta, Canada

Correspondence: David J. Lowe ([david.lowe@waikato.ac.nz](mailto:david.lowe@waikato.ac.nz))

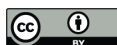

51 **Abstract.** Modern tephra studies *per se* began almost 100 years ago (in the late 1920s) but the first collective  
52 of tephrochronologists, with a common purpose and nascent global outlook, was not formed until 7  
53 September, 1961, in Warsaw, Poland. On that date, the inaugural ‘Commission on Tephrochronology’ (COT)  
54 was ratified under the aegis of the International Union for Quaternary Research (INQUA). COT’s formation  
55 can be attributed largely to the leadership of Kunio Kobayashi of Japan, the commission’s president for its  
56 first 12 years. We were motivated to record COT’s heritage for posterity and also because the discipline of  
57 tephrochronology, including the study of cryptotephra, continues to grow globally at a significant rate. This is  
58 recognition of tephrochronology as both a unique correlational and age-equivalent dating method, and as a  
59 complementary method in other fields, such as volcanology, in which tephra research has been employed to  
60 develop eruption histories and hazards and to help understand volcano-climate interactions. In this article, we  
61 review the history of COT (which also functioned under other names, abbreviated as COTS, CEV, ICCT,  
62 COTAV, SCOTAV, INTAV) under the umbrella of INQUA for 53 of the last 60 years, or under IAVCEI  
63 (International Association of Volcanology and Chemistry of the Earth’s Interior) for seven of the last 60 years,  
64 including since 2019. We describe the development of the commission and its subsequent activities that  
65 include organising nine specialist tephra-field meetings in seven different countries, numerous conference  
66 sessions or workshops, and generating tephra-themed issues of journals/books or specialist internet documents  
67 or websites. The commission began to prosper after 1987 when key changes occurred, and it has blossomed  
68 further, especially in the past decade or so as an entire new cohort of specialists has emerged alongside new  
69 analytical and dating techniques to become a vibrant global group today. We name 29 elected officers  
70 involved with COT since 1961 and their roles, and 15 honorary life members. We also document the aims of  
71 the commission and conclude by evaluating its legacies and current and future work.

72

73

74 **Short summary.** The Commission on Tephrochronology, formed in 1961, comprises global researchers who  
75 characterize, map, and date tephra (volcanic ash) layers and use them stratigraphically as linking and dating  
76 tools in geological, palaeoenvironmental, and archaeological research, and volcanology. We review the  
77 commission’s history – its growth, leadership, and activities for 60 years that include hosting specialist  
78 meetings, symposia, and workshops, developing new analytical and dating methods and protocols, and  
79 encouraging ECRs.

80

81

82

83



*This article is dedicated to the memory of Kunio Kobayashi, who led the founding of the Commission on Tephrochronology in 1961 and helped guide its earliest years*

## 1 Introduction

The term ‘tephra’ (from Greek *τέφρα*, ‘ash’ or ‘ashes’) includes all the explosively-erupted, **unconsolidated** fragmental or pyroclastic products – of any grain size including ash, lapilli, blocks and bombs (Wright et al., 1981) – from a volcanic eruption. ‘Cryptotephra’ are explosive volcanic-eruption derived ash-sized glass-shard and/or crystal concentrations that are preserved in sediments or soils but insufficiently numerous, or which comprise sparse grains too small, to be visible as a layer to the naked eye (Hunt, 1999a; Lowe, 2011a; Lane et al., 2017a). ‘Tephrochronology’ (*sensu stricto*) is a unique correlational and age-equivalent dating method that uses characterized tephra or cryptotephra deposits as isochronous, or time-parallel, layers to link or synchronise geological, palaeoenvironmental, or archaeological sequences or events, and to transfer and apply relative or numerical ages or dates to them where these are known (Lowe and Alloway, 2015). The correlation of deposits from site to site relies on matching the physical properties, mineralogical assemblages, and elemental ‘fingerprints’ (major, minor, or trace elements) of glass shards and/or crystals from the tephra/cryptotephra in combination with stratigraphic superpositioning and numerical age data (Abbott et al., 2020a; Hopkins et al., 2021a). A range of analytical methods and visual and statistical approaches can be used to help facilitate correlation (e.g., Lowe et al., 2017a; Bolton et al., 2020). Correlating dispersed tephra deposits, especially where well dated, back to their volcanic sources allows tephrochronological studies to provide information on the eruption frequency (i.e., eruption history) and geochemical evolution of volcanic regions and individual volcanoes (Abbott et al., 2020a), as well as informing volcanic hazard modelling and providing a means to help understand volcano-climate interactions, all within the realm of volcanology.

In this article we summarise and comment on the history of global collaboration by tephrochronologists, and associated researchers, that has taken place through activities of an international tephra-centred research group over the past 60 years. This group was first, and currently is, known as the ‘Commission on Tephrochronology’ but has had other guises over the years (Table 1). Such a summary is timely because the discipline of tephrochronology (and its burgeoning offspring, cryptotephrochronology) is growing from strength to strength, especially as tephrochronology has become one of the most versatile methods available to geoscientists, Quaternary scientists, and archaeologists that is potentially applicable over timescales spanning years to millions of years (Abbott et al., 2020a). Moreover, the method has the potential to correlate sequences over distances ranging from centimetres to thousands of kilometres, and the capability of linking and dating proximal, metre-thick deposits to diminutive distal layers comprising barely a handful of glass shards that have no visible expression (i.e., cryptotephra) (Hunt, 1999b; Abbott et al., 2020a). Applications of tephrochronology, chiefly for the Quaternary period, are equally varied and are becoming increasingly important in wide-ranging geochronological, palaeoenvironmental, and volcanological studies (Lowe, 2011a).

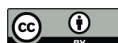

**Table 1.** Progression of names of the international tephra group associated with either INQUA<sup>1</sup> or IAVCEI<sup>2</sup>

|                  |                                                                                                                                                  |
|------------------|--------------------------------------------------------------------------------------------------------------------------------------------------|
| <b>2019-on</b>   | – Commission on Tephrochronology (COT) – IAVCEI                                                                                                  |
| <b>2007-2019</b> | – International Focus Group on Tephrochronology and Volcanism (INTAV) – INQUA                                                                    |
| <b>2003-2007</b> | – Subcommission on Tephrochronology and Volcanism (SCOTAV) – INQUA                                                                               |
| <b>1995-2003</b> | – Commission on Tephrochronology and Volcanism (COTAV) <sup>3</sup> – INQUA                                                                      |
| <b>1991-1995</b> | – Commission on Tephrochronology (COT) – INQUA                                                                                                   |
| <b>1987-1991</b> | – Inter-congress Committee on Tephrochronology (ICCT) – INQUA                                                                                    |
| <b>1982-1987</b> | – Commission on Explosive Volcanism (CEV) <sup>4</sup> , International Association of Volcanology and Chemistry of the Earth's Interior – IAVCEI |
| <b>1961-1982</b> | – Commission on Tephrochronology or Commission on Tephra (COT), International Union for Quaternary Research – INQUA                              |

<sup>1</sup> For a history of INQUA (and Quaternary science), see Neustadt (1969), Porter (1999), and Smalley (2011)

<sup>2</sup> For a history of IAVCEI, see Cas (2019)

<sup>3</sup> According to Lowe (1995, 1996a), the commission from 1995 was initially Commission on Tephra Studies (COTS)

<sup>4</sup> COT was effectively merged with CEV in this period (CEV exists today alongside COT within IAVCEI). Note that CEV was initially called Working Group on Explosive Volcanism (see Sect. 3.3)

To date, however, information about the commission and its activities is scattered and sparse, and so we have assembled this review mainly because we recognised that such information, especially relating to the early years, was fast fading, and needed preserving for succeeding generations. We were also motivated by the especially strong support of commission members over the past decade, growing to well over 120 including increasing numbers of early-career researchers (ECRs), many now becoming proficient and experienced, as expressed at well-attended tephra meetings held in Kirishima, Japan (2010), Nagoya, Japan (2015), Portland, Oregon (2017), Moieciu de Sus, Romania (2018), and Dublin, Ireland (2019) (see Sect. 2). These modern practitioners wanted to maintain and enhance the active global collective the commission had now become.

In undertaking the review, we draw on our own and others' experience, various papers, and snippets from conference proceedings (where available) to provide a historical framework of the commission and some of its globally-focussed activities, mainly conferences or workshops, since its founding in 1961. We have included a variety of images to add colour to the narrative and to show a range of the people and activities involved in the events undertaken.

Apart from some key aspects relating specifically to the development of COT, largely we do not cover the development of the discipline and science of tephrochronology and its advances, which are reviewed extensively elsewhere (e.g., Thórarinnsson, 1944, 1981; Westgate and Gorton, 1981; Froggatt and Lowe, 1990; Hafliðason et al., 2000; Sarna-Wojcicki, 2000; Shane, 2000; Machida, 1991, 2002; Machida and Arai, 2003; Dugmore et al., 2004; Suzuki, 2007; Froese et al., 2008a; Larsen and Eiriksson, 2008; Lowe, 2008, 2011, 2014; Lowe et al., 2011a, 2017; Alloway et al., 2013; Riede and Thastrup, 2013; Smith et al., 2013; Davies et al., 2014; Lowe and Alloway, 2015; Davies, 2015; Ponomareva et al., 2015; Danišik et al., 2017; Lane et al., 2017a; Abbott et al., 2020a; Hopkins et al., 2021a; Lane and Woodward, 2022).

The rise of cryptotephra studies is remarkable and they have been very influential over the past three decades (see Sect. 3.3 and Lowe, 2008; Davies, 2015). Although beginning in Scandinavia in the 1950s and 1960s (with work by Christer Persson, e.g., 1966, 1971; Davies, 2015), then New Zealand in the mid-1970s and



early 1980s (Hopkins et al., 2021a), the new discipline of ‘cryptotephrochronology’ was propelled into the modern systematic era from 1990 by the publication of Andrew Dugmore’s seminal UK-based paper of 1989 (Dugmore, 1989). The term ‘cryptotephra’, although introduced in 1999 (Hunt, 1999a), was first defined only in 2001 (Juvigné et al., 2001; Lowe and Hunt, 2001). The discipline has witnessed new or improved techniques and applications emerging to cater for the demanding, forensic-like requirements of such research (Davies, 2015; Ponomareva et al., 2015; Krüger and van den Bogaard, 2021). We list here examples referring to research on distal cryptotephra deposits, including wide-ranging applications, together with some recent papers on long sedimentary sequences containing cryptotephra (e.g., Turney, 1998; Hunt, 1999b; Hall and Pilcher, 2002; van den Bogaard and Schmincke, 2002; Davies et al., 2004; Gehrels et al., 2008; Lowe, 2008, 2011; Wastegård and Davies, 2009; Swindles et al., 2011, 2019; Wastegård and Boyle, 2012; Riede and Thastrup, 2013; Smith et al., 2013; Davies et al., 2014; Lane et al., 2014; Davies, 2015; Ponomareva et al., 2015; Abbott et al., 2018a, b, 2020a; Wulf et al., 2018; Albert et al., 2019; Leicher et al., 2019; Freundt et al., 2021; Kinder et al., 2021; Jensen et al., in press).

Numerous individuals have been involved with the commission. We record the names of those who have held positions as elected officers or who convened conferences or workshops on behalf of the tephra community. A number of individuals and their contributions to the discipline of tephrochronology have been reported in historical articles, special editorials, or obituaries (see Vucetich, 1982; Björnsson, 1983; Royal Geographical Society, 1983; Lowe, 1990a; Wilson, 2005; Self and Sparks, 2006; Tonkin et al., 2007; Froese et al., 2008b; Lowe et al., 2008a, 2015a, 2017b; Slate and Knott, 2008; Hunt, 2011; Moriwaki et al., 2011a; Suzuki et al., 2011; Benediktsson et al., 2012a; Steinhórrsson, 1985, 2012; Alloway et al., 2013; Kile, 2013; Thomas and Lamothe, 2014; Plunkett et al., 2017; Lindqvist et al., 2019; Bunting et al., 2020; Hopkins et al., 2021a).

## **2 Formation and development of COT as an international specialist tephra research group and its activities**

### **2.1 Formation of COT in 1961**

The Commission on Tephrochronology (COT), today hosted within IAVCEI, is the current incarnation of a series of international tephra-related research groups whose history as a collective can be traced back to 7 September, 1961 (Table 1). The formation of the commission was initiated at a meeting of the National Committee of Quaternary Research, Science Council of Japan, in Tokyo on 6 February, 1961. Attendants agreed that a proposal to form a commission on tephrochronology should be developed and presented at the forthcoming VI<sup>th</sup> Congress of the International Union for Quaternary Research (INQUA) being held in Warsaw, Poland, in September that year. Kunio Kobayashi (Fig. 1), Masao Minato, and Sohei Kaizuka were appointed to develop one (Kobayashi, 1965).

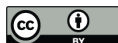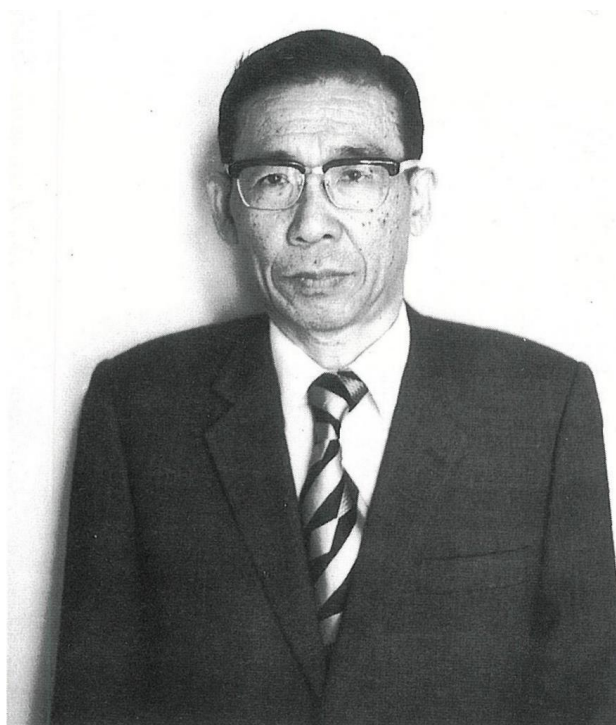

小林 国夫 先生  
 〈 遺影は1978年10月12日撮影 〉

**Figure 1.** Professor Kunio Kobayashi (19 February, 1918–19 June, 1979), driving force and founding president of COT. Photo taken 12 October, 1978 (from Committee for Publishing of Selected Papers by Professor Kunio Kobayashi, 1990).

The Japanese trio prepared the proposal and, before the Warsaw Congress, mailed it to those engaged in tephrochronological studies in various volcanic regions of the world and to the congress Secretariat. The Secretariat copied part of the proposal, along with a list of publications on tephra studies provided by the Kanto Loam Research Group of Japan, for distribution to conference participants. The pre-congress proposal to form a COT within INQUA was as follows (Kobayashi, 1965, p. 782):

“Aims of the Commission: To advance the progress to the method [i.e., to develop the method] of tephrochronology and Quaternary researches based on tephrochronology.

Means of achieving these aims: 1. Gathering and exchange of information on tephrochronological studies in various countries; 2. Report on the results of studies at the next INQUA congress.

Proposed by Masao Minato (Hokkaido University), Kunio Kobayashi (Shinshu University), Sohei Kaizuka (Tokyo Metropolitan University).”



223 At the Warsaw Congress, the three proposers and others convened on 6 September, 1961, to formulate  
 224 a resolution to present to the General Assembly. Despite all the preparatory work, it seems the process was by  
 225 no means plain sailing. On arrival in Warsaw, Kobayashi had scanned the list of scientists coming to the  
 226 congress and discovered to his consternation that no tephra specialists were attending (other than from Japan).  
 227 However, Terah ('Ted') L. Smiley, a dendrochronologist from Tucson, USA, helped Kobayashi garner  
 228 support from various delegates from a wide range of disciplines (which, on reflection, may have ultimately  
 229 been to Kobayashi's advantage) including Väinö Auer, a pioneering tephrochronologist from Finland who had  
 230 worked in South America from 1928 (e.g., Auer, 1965), Neville Moar, a New Zealand palynologist who was  
 231 well aware of the growing importance of tephra studies (e.g., Moar, 1961), André Cailleux, a French glacial  
 232 geologist, and Carl Troll, a German geographer (Kobayashi, 1962, p. 129).

233 The full resolution as presented to the General Assembly is recorded below (Kobayashi, 1962, p. 130,  
 234 slightly edited):

235

236 "[A] session of the proposed Commission on Tephrochronology was held yesterday afternoon. The significance of  
 237 studies on volcanic ash layers as a key [means] of correlation of events in the Quaternary was [described] by the  
 238 chairman and [the] establishment of a commission to promote the international co-operation of this matter was  
 239 discussed. As a result of discussion, [and] considering the significance of investigation to clarify the sequence of  
 240 events in ... Quaternary volcanic activities, and also considering eolian Quaternary volcanic ash layers to be useful as  
 241 a key [method for] correlation of ... Quaternary formations, geomorphic surfaces and so on, the following persons  
 242 cited below agreed to propose the foundation of the Commission on Tephrochronology in INQUA.  
 243

244 They ask the General Assembly to agree [to] the foundation of a new commission and appoint Prof. Kobayashi as the  
 245 organizer [chair/president] of the commission. The [president] should arrange the organization of the Commission on  
 246 Tephrochronology till the following Congress of INQUA 1965 and report the activities of the commission after this  
 247 congress."  
 248

249 The resolution was signed by E.H. Muller (USA), N.T. Moar (New Zealand), Ladislav Bánesz  
 250 (Czechoslovakia), F. Mancinini (Italy), H.D. Kahlke (Germany), P. Bellair (France), T.L. Smiley (USA), T.  
 251 Yoshikawa (Japan), and Shoji Horie (Japan) (Kobayashi, 1962, p. 130). The following day on 7 September,  
 252 1961, it was adopted by the General Assembly of INQUA with Kobayashi declared the commission's  
 253 founding president (Kobayashi, 1962, 1965) (see Sect. 3 below).

254 We note here that Neustadt (1969, p. 90) referred to the commission (which was the eighth to be  
 255 formed in INQUA's history) as the "Commission pour la tephrochronologie", i.e., Commission *for* rather than  
 256 *on* tephrochronology. However, we prefer 'on' as reported by Kobayashi (1962, 1965), and COT forms a  
 257 mellifluous acronym. Also, it seems that Kobayashi was the sole officer (president) within COT from 1961 to  
 258 1969. By the start of the 1969 Paris Congress, two other commissions in INQUA similarly comprised just a  
 259 president, but the remaining seven commissions had either two or three officers (Neustadt, 1969).

260 Interestingly, prior to the Warsaw resolution, Kobayashi had received a letter of support for the  
 261 commission from Sigurdur Thórarinnsson, regarded by many as the founder of the science of tephrochronology  
 262 (Steinthórsson, 2012), and IAVCEI awards a medal in Thórarinnsson's honour. Thórarinnsson emphasised that  
 263 the term 'tephrochronology' rather than 'ash' should be used in the commission's name. In his letter of 1961,





Thórarinnsson defined tephrochronology as “chronology based on the study of the successive deposits of fragmental volcanic products” (Thórarinnsson, 1965, p. 785). This definition relates to the original sense (*sensu stricto*) of the term tephrochronology – essentially as proposed by Thórarinnsson (1944, 1954) and as outlined in the introduction – namely, the use of tephra layers as isochrons to connect or correlate sequences, and to transfer relative or numerical ages to such sequences where the tephra have been identified and dated. In recent times, however, the term ‘tephrochronology’ has been used more broadly to encompass all aspects of tephra studies (including correlating and dating via tephrochronology), and this wider sense (*sensu lato* of Lowe and Hunt, 2001) is preferable in denominating the commission. Thórarinnsson also noted that he would “gladly accept a membership in such a commission” and he suggested four other possible members (V. Auer, H. Straka, J. Frechen, and R. Wilcox), who (with Thórarinnsson) may or may not have been elected as foundation members.

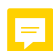

## 2.2 Hosting of commission by INQUA or IAVCEI since 1961

For most of the time since 1961, the commission has been hosted under the umbrella of INQUA (Table 1), but with the creation of the new COT in 2019, the collective is now hosted by IAVCEI, where the group was temporarily housed between 1982 and 1987. The penultimate incarnation, INTAV, was formed in 2007 as an International Focus Group (IFG) within the newly-formed Stratigraphy and Chronology Commission (SACCOM) of INQUA (Table 1). INTAV operated under the INTREPID projects I and II (2009–2015, ‘Enhancing tephrochronology as a global research tool’) and then the EXTRAS project (2015–2019, ‘EXTending TephRAS as a global geoscientific research tool stratigraphically, spatially, analytically, and temporally within the Quaternary’) (e.g., Lowe, 2013, 2015, 2018a).

Most recently, discussions at the ‘Tephra Hunt’ meeting in Romania in 2018 led to a near-unanimous decision to form a new commission (COT) within the IAVCEI framework rather than INQUA. The rationale for change is outlined in Lowe et al. (2018), and some of the difficulties of INQUA’s complex and cumbersome structure were expressed by Ashworth (2018). The main reason for switching to IAVCEI was that the global tephra community very strongly indicated that it wanted to remain part of a formal and, critically, *ongoing* global collective of tephra specialists as a stand-alone entity. This stand-alone status was available within IAVCEI (and as a commission would be a potential recipient of funding from that parent body) but not within INQUA. It would also allow for regular meetings at *specialist tephra conferences or workshops* rather than being specialists taking part within conferences for other disciplines (important though such multi-disciplinary meetings are). In INQUA, the original commissions (such as COT) had been replaced by subcommissions in 2003 at the Reno INQUA Congress, and then removed entirely because five much broader, over-arching commissions (including SACCOM) were formed in 2007 at the Cairns INQUA Congress. These new commissions adopted a project-based approach rather than relying on the small individual commissions, some of which were inactive, to initiate and undertake projects involving IFGs





300 including INTAV. But such focus groups had a limited shelf-life, normally two inter-congress periods (i.e.,  
301 eight years) at most, after which they were to end, although INTAV managed to persist, somewhat aberrantly,  
302 for 12 years.

303

304 2.3 Specialist stand-alone tephra-centred conferences hosted by COT (or equivalent) since 1964, and outputs  
305

306 Nine international specialist tephra field conferences, led by 23 convenors in total and attracting between 37  
307 and 92 participants, have been organised in seven different countries around the globe since 1964 (Table 2).  
308 Three of the nine meetings have been held in Japan. In terms of the entire 60-year history, the number of  
309 meetings has doubled in the last 30 years, with six meetings taking place since 1991 (i.e., approximately every  
310 five years on average). The average number of participants at each meeting is 58. The field conferences are  
311 exceptionally important because they not only facilitate an opportunity for the presentation and discussion of  
312 the latest advances in tephra studies or their application, but also they provide exceptional insight into the  
313 geological, palaeoenvironmental, and archaeological history of a specific region encompassing the conference  
314 location (Davies and Alloway, 2006). Furthermore, Lowe et al. (2018, p. 1) noted that “one of the joys of  
315 science, and tephrochronology and volcanic studies in particular, is the opportunity to meet like-minded  
316 colleagues and keen students in the field where formalities and reserve seem to dissipate in the face of shared  
317 interests, friendly discussions at the outcrop, and in meeting new people and cultures whilst being graciously  
318 hosted in new countries.” In addition, the conferences provide opportunities and critical support (including  
319 mentoring) and inspiration for ECRs including PhD students.

320

#### 321 2.3.1. Tokyo, Japan, 1964

322 Referred to normally as ‘inter-congress’ or ‘inter-INQUA’ conferences because of their occurrence between  
323 the four-yearly, full-congress meetings of INQUA, the first stand-alone tephra meeting of COT took place in  
324 Tokyo, Japan, from 26–29 November, 1964. Including field excursions to see Asama volcano and sites in  
325 Tokyo (Ikuta, Chitose, Todoroki) (Fig. 2), the meeting attracted 50 participants, seven from beyond Japan  
326 including Sigurdur Thórarinnsson (Iceland) and dendrochronologist Paul E. Damon (USA), along with Hiroshi  
327 Machida (Japan) attending his first COT meeting, who appears to be COT’s longest standing member, 57  
328 years, as at November, 2021. Seven presentations were made (Neustadt, 1969).

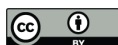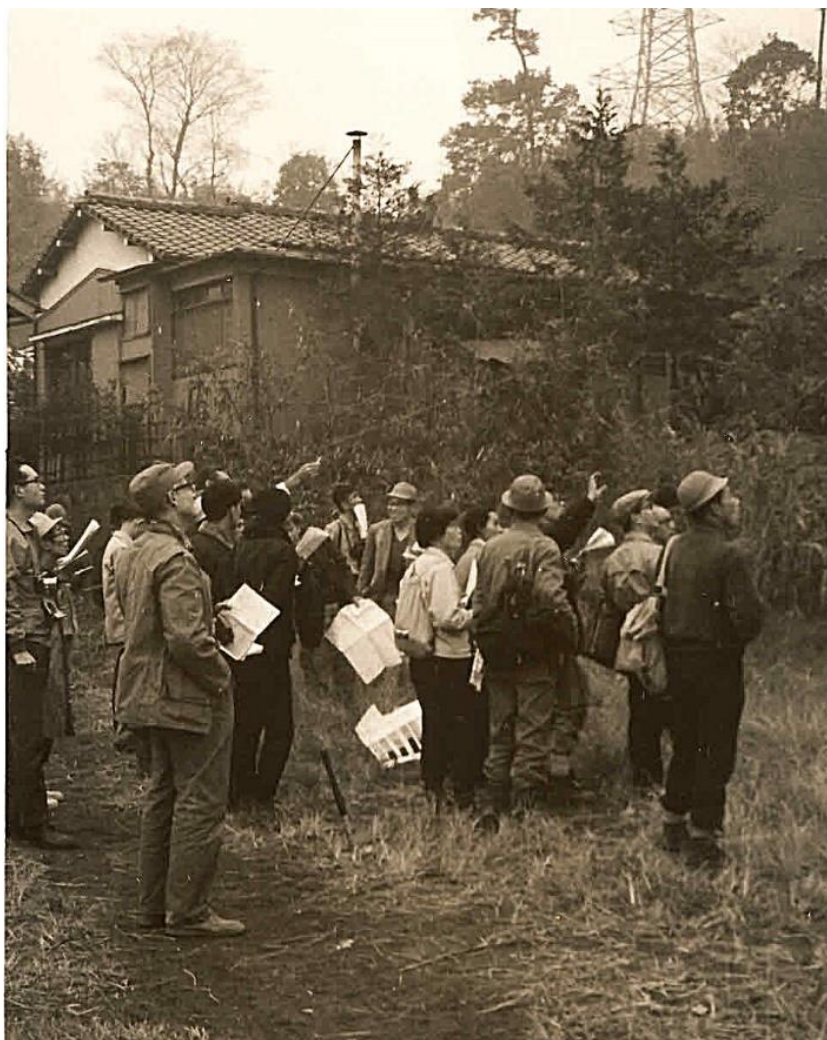

329  
330 **Figure 2.** Field trip at Ikuta during the first COT meeting in Tokyo, November 1964 (from Suzuki et al., 2011,  
331 p. 8).  
332  
333  
334  
335  
336  
337  
338  
339  
340  
341  
342

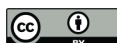

**Table 2.** List of international inter-INQUA tephra-centred field meetings of COT, ICCT, COTAV, SCOTAV, or INTAV (excludes sessions/symposia associated with quadrennial INQUA/IAVCEI congresses or other conferences or workshops)\*

|             |                                                                                                                                                                                         |
|-------------|-----------------------------------------------------------------------------------------------------------------------------------------------------------------------------------------|
| <b>2018</b> | – Tephra Hunt in Transylvania, Moieciu de Sus, Romania (24 June–1 July, 92 participants) <sup>1</sup>                                                                                   |
|             | <i>Convenors:</i> Daniel Veres, Ulrich Hambach                                                                                                                                          |
| <b>2010</b> | – Active Tephra in Kyushu, Kirishima, Japan (9–17 May, 76 participants) <sup>2</sup>                                                                                                    |
|             | <i>Convenors:</i> Takaaki Fukuoka, Hiroshi Moriwaki, Takehiko Suzuki                                                                                                                    |
| <b>2005</b> | – Tephra Rush in Yukon, Dawson City, Canada (31 July–8 August, 41 participants) <sup>3</sup>                                                                                            |
|             | <i>Convenors:</i> Duane Froese, John Westgate (with Brent Alloway)                                                                                                                      |
| <b>1998</b> | – Tephrochronology and Co-existence of Humans and Volcanoes (Inter-INQUA and Inter-IUSPP), Brives-Charensac (Haute-Loire), France (24 August–1 September, 53 participants) <sup>4</sup> |
|             | <i>Convenors:</i> Étienne Juvigné, Jean-Paul Raynal                                                                                                                                     |
| <b>1994</b> | – Tephrochronology-Loess studies-Paleopedology, Hamilton, New Zealand (7–17 February, 62 participants) <sup>5</sup>                                                                     |
|             | <i>Convenor:</i> David Lowe                                                                                                                                                             |
| <b>1993</b> | – Climatic Impact of Explosive Volcanism (PAGES/INQUA-COT Workshop), Meiji University, Chiyodaku, Tokyo, Japan (1–5 December, 37 participants) <sup>6</sup>                             |
|             | <i>Convenors:</i> Hiroshi Machida, James (Jim) Begét                                                                                                                                    |
| <b>1990</b> | – Mammoth Hot Springs, Yellowstone National Park, USA (17–26 June, 53 participants) <sup>7</sup>                                                                                        |
|             | <i>Convenors:</i> John Westgate, Nancy Naeser, Bill Hackett                                                                                                                             |
| <b>1980</b> | – Tephra Studies as a Tool in Quaternary Research, Laugarvatn (and Reykjavík), Iceland (18–29 June, 60 participants) <sup>8</sup>                                                       |
|             | <i>Convenors:</i> Stephen Sparks, Stephen Self, Guðrún Larsen (with Sigurdur Thórarinnsson)                                                                                             |
| <b>1964</b> | – Tephra Field Meeting of COT (inaugural meeting), Tokyo, Japan (26–29 November, 50 participants)                                                                                       |
|             | <i>Convenors:</i> Kunio Kobayashi, Sohei Kaizuka, Takeshi Matsui                                                                                                                        |

\*For abbreviations see Table 1. Special volumes/issues arising from the meetings are as follows: 1, Abbott et al. (2020b); 2, Lowe et al. (2011b); 3, Froese et al. (2008c); 4, Juvigné and Raynal (2001b); 5, Lowe (1996c); 6, Begét et al. (1996); 7, Westgate et al. (1992b); 8, Self and Sparks (1981c)

At the 1964 Tokyo COT meeting, the decision was taken to develop and publish a world bibliography of Quaternary tephrochronology (Westgate, 1974). The agreement was reinforced at the 1965 INQUA Congress in late August/early September at Boulder, USA, at a COT session that included representatives from institutions in ten counties (Neustadt, 1969). Kunio Kobayashi and Roald ('Fryx') Fryxell handled the project initially and then John Westgate took over on his election as secretary of COT at the INQUA Congress in Paris in 1969. Westgate had first become involved with COT at the 1965 INQUA Congress in Boulder, and has thus been a member for 56 years as at November, 2021. An ambitious deadline for completing the book's compilation was set for December, 1971 (Steen-McIntyre, 1971). Substantial grants to COT provided by INQUA and other funders in the early 1970s enabled the volume, entitled *World Bibliography and Index of Quaternary Tephrochronology*, to be published by Westgate and Gold (1974), ten years after it was first mooted (Kaizuka, 1974). Amongst a treasure trove of wide-ranging information, the volume contains an update by Thórarinnsson (1974) on the terms 'tephra' and 'tephrochronology' twenty or thirty years on, respectively, from the definitions he wrote in 1954 and 1944. In 1973, Thórarinnsson, an influential 'formal member' of COT at the time (later an honorary president of the commission from 1977–1982), was successfully persuaded at the 1973 INQUA Congress in Christchurch, New Zealand, that the term 'tephra' be broadened to include unconsolidated pyroclastic flow deposits (non-welded ignimbrites) (Cole et al., 1972;



391 Howorth, 1975; Thórarinnsson, 1981). Although endorsed by COT, this amplification was considered by some  
 392 to have ruined the use of the word ‘tephra’ (*sensu stricto*), and there are still tephrochronologists who do not  
 393 use the wider meaning (*sensu lato*) of the word (Vince Neall personal communication, 2017). Even though  
 394 Thórarinnsson’s (1954) definition did not specifically exclude flow deposits, Neall (1972, p. 510) argued that  
 395 because pyroclastic flow deposits ‘flow from a crater during an eruption’ they should not be considered  
 396 ‘tephra’ and hence should be classified separately as ‘flow deposits’. Nevertheless, by 1973–74, the term  
 397 ‘tephra’ (*sensu lato*) was no longer restricted to fall deposits because it had been recognised that ignimbrites  
 398 could be partly or entirely non-welded and unconsolidated (Ross and Smith, 1961; Sparks et al., 1973;  
 399 Froggatt and Lowe, 1990). Furthermore, it was argued by Thórarinnsson (1974), who had used the term ‘tephra  
 400 flow’ to describe a small pyroclastic flow descending from the slopes of Mt. Lamington in an eruption in  
 401 1951, and also for the non-welded uppermost layer of the Thorsmörk ignimbrite in Iceland (Thórarinnsson,  
 402 1969), that such deposits, strictly, were ‘airborne’ in their emplacement (e.g., see Lube et al., 2019). However,  
 403 the term ‘air-fall’ is now rarely used, with tephra-fall/fallout, or ash-fall/fallout if appropriate, typically  
 404 employed instead (Cole et al., 1972; Schmid, 1981; Lowe and Hunt, 2001; Lowe, 2008).

#### 406 2.3.2. Laugarvatn and Reykjavík, Iceland, 1980

407 The next specialist tephra conference, in June, 1980, took place 16 years after the 1964 Tokyo meeting. Held  
 408 in Laugarvatn and Reykjavík, Iceland, it was supported by the NATO Advanced Studies Institute and COT  
 409 (Self and Sparks, 1981a, b) (Fig. 3).

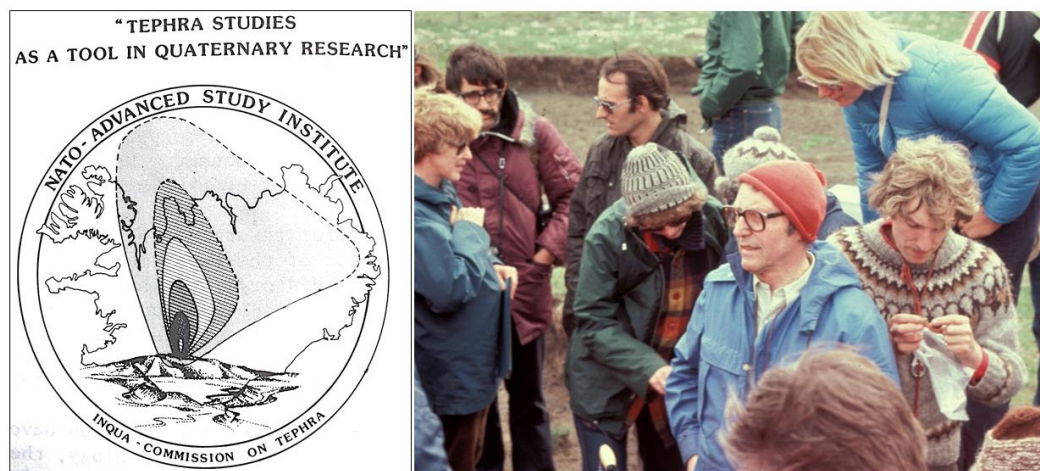

411  
 412 **Figure 3. (Left)** Logo for the Icelandic INQUA-COT tephra meeting in June 1980 that was designed by Sue  
 413 Selkirk (Arizona State University) (Self and Sparks, 1981a), depicting the distribution of the historic silicic  
 414 tephra, H<sub>1</sub>, erupted from Hekla in 1104 AD, the outermost isopach being 2 mm (isopach map based on Larsen  
 415 and Thórarinnsson, 1977, p. 29, although it had been originally mapped by Thórarinnsson in 1939:  
 416 Steinthórsson, 2012, p. 5). **(Right)** Some participants in the field in Iceland during the meeting. Figure centre-



front with blue jacket is Sigurdur Thórarinnsson; just behind him (with sample bag) is (Sir) Stephen Sparks.  
Photo: Malcolm Buck.

At this Iceland meeting, it is striking that Self and Sparks (1981a, p. xii), closely following Thórarinnsson (1974, p. xviii), defined ‘tephra’ (*sensu lato*) as “a collective term for all airborne pyroclasts, including both air-fall and pyroclastic flow material”, pointing out that “this usage complements rather than replaces terms such as ignimbrite, welded tuff, pumice, etc., that are used to designate specific types of tephra produced by distinctive types of eruption”. Also, as evident on the conference logo image in Fig. 3, they referred to the Commission on ‘Tephra’, rather than ‘Tephrochronology’, presumably because the latter term was seen to be somewhat restricted in its original sense (use of tephra layers as a correlational and age-equivalent dating tool) so that potential volcanological interpretations and applications appeared to be downplayed. Later, advent of the names Commission, or Subcommission, on Tephrochronology and Volcanism – i.e., COTAV or SCOTAV in 1995 and 2003, respectively (Table 1) – made ‘volcanology’ an explicit function of the commission. However, as noted previously, today’s more holistic usage of ‘tephrochronology’ (*sensu lato*), encompassing all aspects of tephra studies including volcanology, now negates this argument and obviates the need to include ‘volcanism’ in the modern commission’s name (Lowe and Hunt, 2001; Lowe, 2008). (Also, COT, being sponsored by IAVCEI, has an obvious volcanological connection.)

### 2.3.3. Mammoth Hot Springs, USA, 1990

The tephra meeting in 1990 in Mammoth Hot Springs (Yellowstone National Park), Wyoming, USA, was next, the first of what might be deemed a ‘golden decade’ in which four specialist tephra conferences were held (Table 2). The meeting in Mammoth, under the ICCT banner, comprised around 53 participants, the majority from the USA but with representatives also from Canada, Japan, New Zealand, Australia, Belgium, Tanzania, Ethiopia, and the UK (Fig. 4). Some scientists from the USSR and several other countries were unable to attend because of financial limitations or (in the case of the Soviets) a lack of flights at that tumultuous time (Lowe, 1990b).



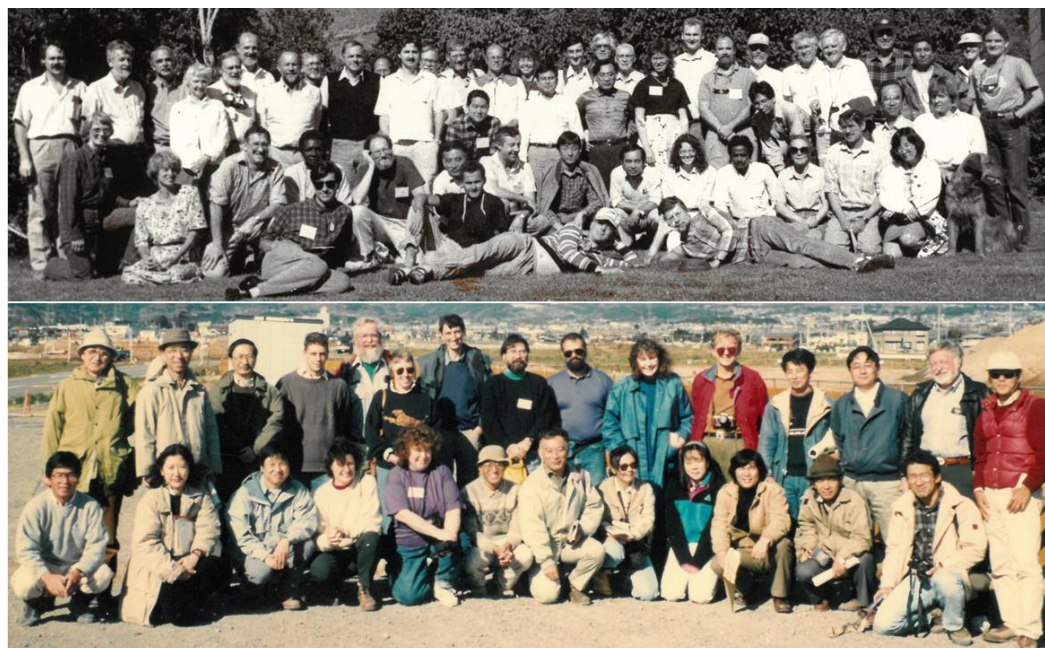

**Figure 4. (Upper)** Participants of the ICCT tephra meeting held in Mammoth Hot Springs, Yellowstone National Park, USA, June, 1990. Photo: anonymous. **(Lower)** Participants in the field on 4 December, 1993, near Haruna volcano, northern Kanto, Japan, during the PAGES/INQUA-COT workshop on the climatic impact of explosive volcanism. Photo: anonymous. Names of the participants in this photo are listed in Appendix A.

Presentations featured a notable array of new dating techniques for tephra components such as isothermal-plateau fission-track dating (ITPFT) of glass, single-crystal laser fusion analysis using  $^{40}\text{Ar}/^{39}\text{Ar}$ , luminescence dating, and high-precision radiocarbon ( $^{14}\text{C}$ )-dating using liquid scintillation spectrometry. In addition, reports from ICCT working groups were presented, including one to standardise the characterization of tephra deposits, the role of tephra in land-sea correlation, and the development of a catalogue of widespread Quaternary tephra. Five days were spent in the field (six or seven counting the days travelling overland to and from Mammoth), two being in the Yellowstone Park region of the Yellowstone Plateau Volcanic Field, and three on a post-conference tour looking mainly at Yellowstone tephra localities, Quaternary deposits and, occasionally, soils and paleosols in northern Yellowstone National Park and the northern Bighorn Basin, Wyoming (Lowe, 1990b).

A conspicuous outcome of the Mammoth conference was the publication of the first of a number of proceedings in the journal *Quaternary International*, which was founded in 1987 and is owned by INQUA (and therefore returns a profit to the union to help fund its activities) (Catto, 2019). The Mammoth conference special issue, entitled straightforwardly as ‘Tephrochronology: stratigraphic applications of tephra’ and comprising 27 scientific papers, was an early double-volume of the journal (Westgate et al., 1992a, b).



469 2.3.4. *Tokyo, Japan, 1993*

470 The Tokyo meeting in 1993, co-sponsored by the Past Global Changes (PAGES) Core Project of the  
471 International Geosphere-Biosphere Programme (Oldfield, 1998) and INQUA's COT, was the first to be  
472 designated as a field conference *and workshop* because it focussed on a specific theme, namely the impact of  
473 volcanism on climate. As well as spending time in the field (Fig. 4) and in oral presentations, the 37  
474 participants (representing institutions in six countries) were therefore involved in break-out sessions in four *ad*  
475 *hoc* working groups:

- 476 • Modelling studies, ice cores, frozen ground, historic, and non-biologic records
- 477 • Tree-rings, palynology, corals (biologic records)
- 478 • Volcanology and climate components
- 479 • Tephrochronology.

480 Their task was to answer a series of topical questions and to synthesise ideas and data. A final discussion  
481 session led to a series of recommendations that were published in a report by Begét et al. (1996).

482

483 2.3.5. *Hamilton, New Zealand, 1994*

484 The meeting in Hamilton, on New Zealand's North Island, in February, 1994, as well as being the first in the  
485 Southern Hemisphere, was noteworthy in being the first to be held under the INQUA banner that involved  
486 three commissions – tephrochronology, loess studies, and paleopedology. The conference included a special  
487 symposium, the 'C.G. Vucetich Symposium on Tephrostratigraphy and Tephrochronology in New Zealand'.  
488 The 62 participants (including 12 students) from institutions in 12 countries (Fig. 5) spent two days in the field  
489 during the conference and a group of 35 took part in the five-day post-conference North Island field trip  
490 (Lowe, 1994b). Along with the field guides, the proceedings took up three slender but contiguous volumes of  
491 *Quaternary International* and comprised 27 scientific papers (Lowe, 1996b, c).

492



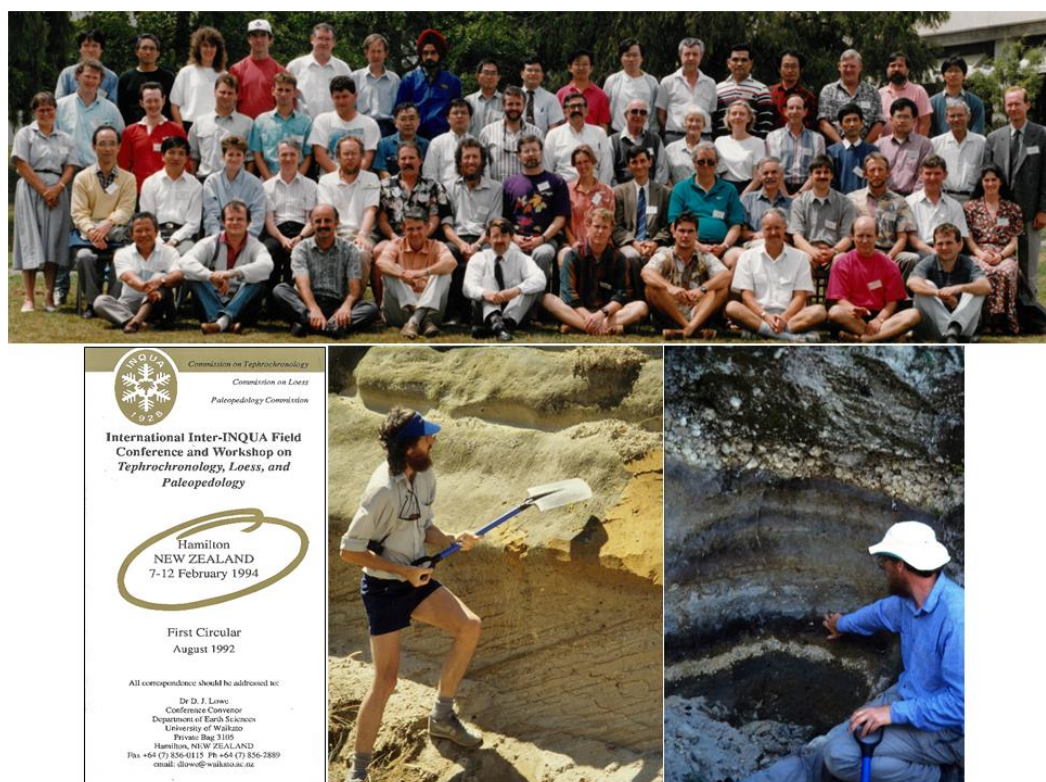

**Figure 5. (Upper)** Participants in the integrative triple-discipline (tephra-loess-paleosols) meeting at University of Waikato, Hamilton, New Zealand, photographed on 8 February, 1994. Photo: Ross Clayton (University of Waikato). Names of the participants in this photo are listed in Appendix A. **(Lower) (Left)** Front page of flyer prepared prior to the meeting in New Zealand. **(Middle)** Brad Pillans exposing buried soil horizons (paleosols) formed on early Holocene, Taupo volcano-derived rhyolitic tephra overlying steeply dipping reworked Oruanui eruptives deposited into a temporary lake, Lake Taupo forest area, central North Island (stop 7 on day-one of five-day post-conference field trip, 13 February; Wilson, 1994). **(Right)** Colin Wilson explaining the stratigraphy of mid-Holocene Taupo-derived eruptives (~5.4–4.5 cal ka) with intervening soil horizons near southern Lake Taupo (stop 11). Photos: David Lowe.

#### 2.3.6. Brives-Charenac, France, 1998

The meeting held in Brives-Charenac in the Haute-Loire region of southern France from 24–29 August, 1998, with 53 participants from institutions in 11 countries, successfully brought together tephrochronology and volcanism (as represented by COT) and their relationship to humans in antiquity (Fig. 6). The latter aspect was represented by Commission 31, ‘Humans and Active Volcanoes during History and Prehistory’, of the International Union of Prehistoric and Protohistoric Sciences (IUSPP) (Table 2).

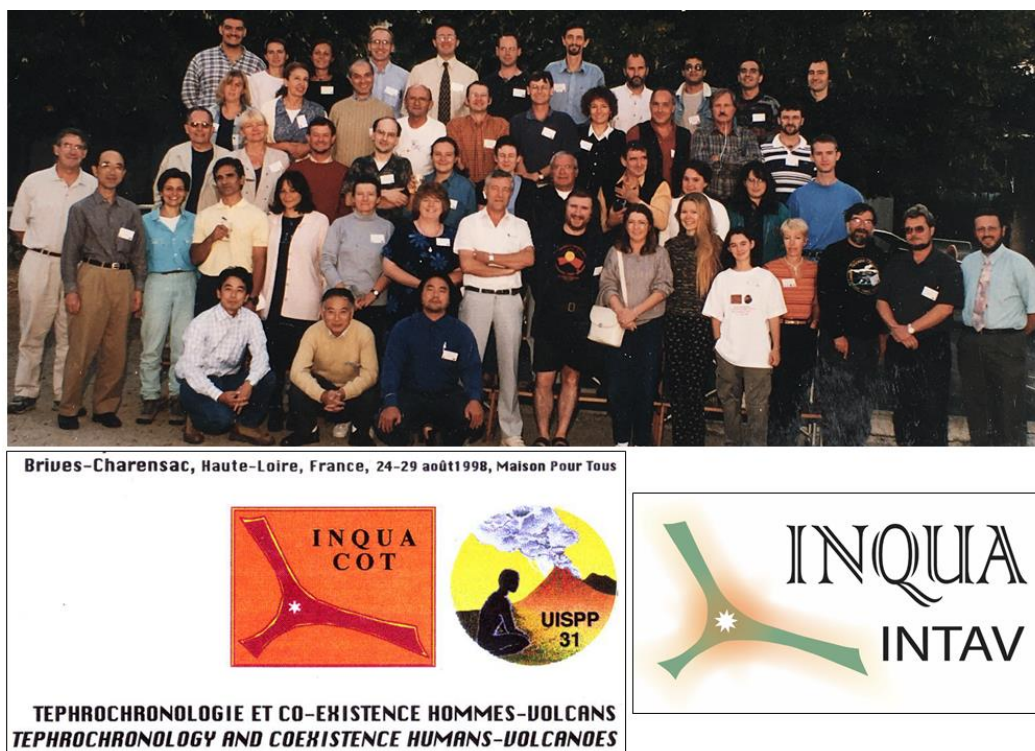

TEPHROCHRONOLOGIE ET CO-EXISTENCE HOMMES-VOLCANS  
 TEPHROCHRONOLOGY AND COEXISTENCE HUMANS-VOLCANOES

513

514 **Figure 6. (Upper)** Participants in the tephra meeting held in Brives-Charenac, France, in August, 1998.  
 515 Photo: Jean-Paul Raynal. **(Lower) (Left)** Part of cover page for programme/abstracts volume of the meeting,  
 516 The COT logo – a three-armed bubble-junction (cusped) glass shard with an electron probe (or laser) beam  
 517 spot on it – was designed by Paul van den Bogaard (Germany). **(Right)** After COT became INTAV in 2007,  
 518 cartographer Betty-Ann Kamp (University of Waikato) updated the logo in 2008 to this now-familiar form.  
 519

520 By this time, a logo for the commission had been developed by Paul van den Bogaard (Fig. 6),  
 521 possibly in anticipation of the tephra-based field trip to the Eifel Volcanic Field he co-led prior to the Berlin  
 522 INQUA Congress held in August, 1995 (Lowe, 1995). The Brives-Charenac conference was followed by a  
 523 three-day post-conference field trip across the Massif Central volcanic fields. Although it had been originally  
 524 planned that the conference proceedings would appear in the journal *Quaternaire*, the large number of papers  
 525 accepted, 27 in total, rendered that option impractical. Remarkably, a new journal, *Les Dossiers de l'Archéolo-*  
 526 *Logis*, was established in which all the papers were eventually published (Juvigné and Raynal, 2001a, b).

527

528

529 2.3.7. Dawson City, Canada, 2005

530 Seven years passed before the spectacular 2005 'Tephra Rush' meeting, now under the banner of SCOTAV,  
 531 was held in Dawson City, Yukon Territory, Canada (Fig. 7; Alloway et al., 2005). The meeting, comprising 41  
 532 participants from institutions in 11 countries (Table 2), began with an evening public lecture in Whitehorse by





533 volcanologist and author Grant Heiken, thereby helping to enhance public dissemination of tephra-based  
 534 research (one of the aims of the commission: see Sect. 4 below). Heiken explored the different human  
 535 perceptions of volcanoes and the risks of living in the shadow of a volcano. A second public lecture was given  
 536 during the conference by Paul Matheus on the topic of Beringian mammals. A one-day field trip from  
 537 Whitehorse to Dawson took place on 1 August, 2005 (Fig. 7), and two days were spent in the Klondike  
 538 Goldfields during the conference itself (Davies and Alloway, 2006).  
 539

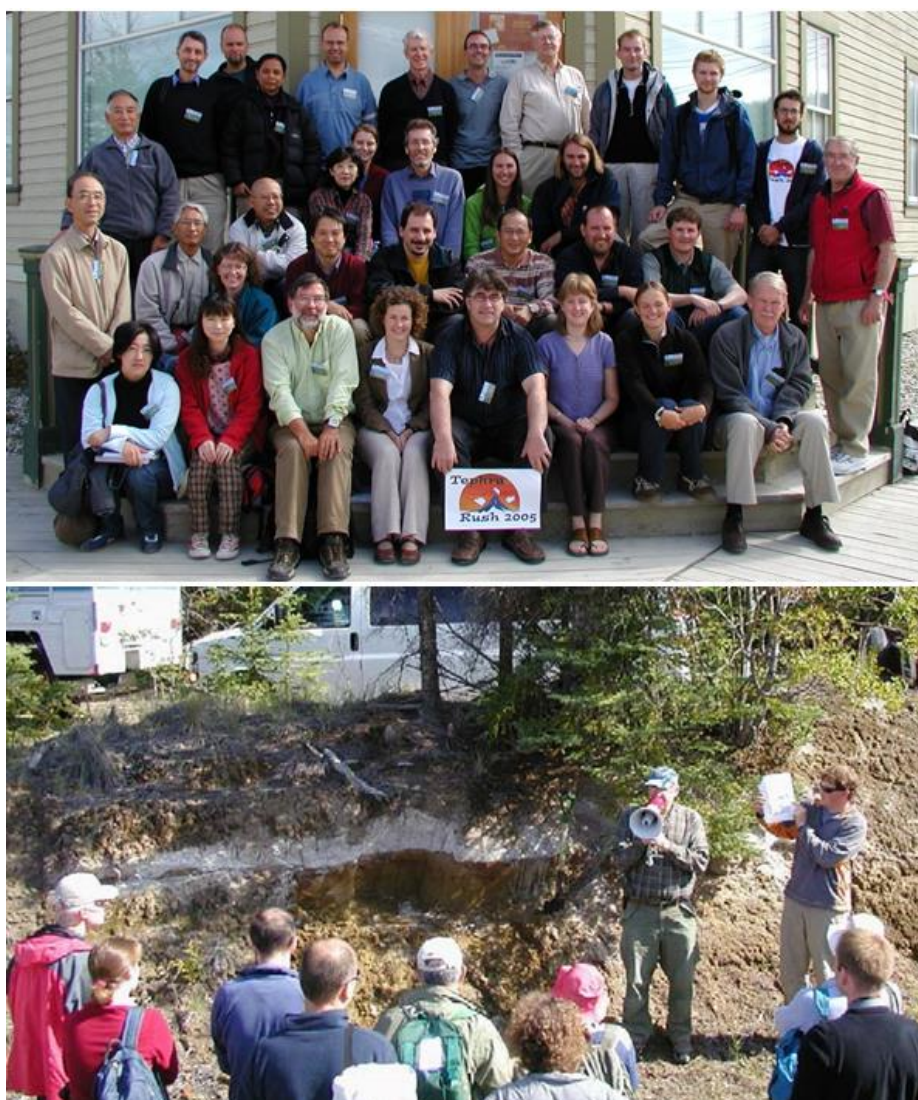

540  
 541 **Figure 7. (Upper)** Participants in the 2005 ‘Tephra Rush’ meeting on 3 August, 2005, in Dawson City,  
 542 Yukon Territory, Canada (from Froese et al., 2008a, p. 2). Photo: Brent Alloway. Names of the participants in  
 543 this photo are listed in Appendix A. **(Lower)** John Westgate (with megaphone) and Duane Froese on 1  
 544



545 August, 2005, explaining the stratigraphy, chronology, composition, and distribution of the AD 833–850  
 546 White River Ash (eastern lobe) on the pre-conference trip from Whitehorse to Dawson (Froese et al., 2005).  
 547 The eruption was coincident with the transition in southern Yukon from atlatl and throwing dart technology to  
 548 adoption of bow and arrow, which were likely present a few hundred years earlier in southern Alaska.  
 549 Possibly a proto-Athapaskan population inhabiting the region was strongly affected by the ecological impacts  
 550 of the volcanic eruption and migrated, at least temporarily, from the thick tephra-fall region to encounter this  
 551 technology (Davies and Alloway, 2006). Diminutive forms of the same White River ash were recognised by  
 552 Jensen et al. (2014) as a cryptotephra in Greenland and northern Europe (where it is dated AD 846–848), the  
 553 first record of the ‘transatlantic distribution’ of an eruptive. Photo: Brent Alloway.

554  
 555 The subsequent special issue of *Quaternary International*, edited by Froese et al. (2008c), comprised  
 556 20 scientific articles based on presentations at Dawson, as well as from a special session of the annual  
 557 Geological Society of America conference (held in Salt Lake City in October, 2005) entitled ‘Advances and  
 558 Applications of Tephrochronology and Tephrostratigraphy: in Honor of Andrei M. Sarna-Wojcicki’. The  
 559 special issue by Froese et al. (2008c) was the first by the commission to specifically honour in its title two of  
 560 the biggest names in tephrochronology, John Westgate and Andrei Sarna-Wojcicki (Froese et al., 2008b; Slate  
 561 and Knott, 2008).

#### 562 563 2.3.8. Kirishima City, Japan, 2010

564 In 2010, the commission returned to Japan where a meeting was held in Kirishima City in southern Kyushu  
 565 from 9–17 May, 2010, this time under the INTAV banner. One reason for the meeting to be hosted in Japan  
 566 was to expose the emerging cohort of cryptotephra specialists (who tended to work only on sparse shards from  
 567 mainly distal or ultra-distal locations) to proximal pyroclastic and volcanic deposits as a way of broadening  
 568 their experience and understanding. The conference was held during a lull in the 2010 eruptions of  
 569 Eyjafjallajökull in Iceland, with the latter’s on-and-off behaviour (Gudmundsson et al., 2010; Davies et al.,  
 570 2010) creating opportunities for considerable press interest in the meeting (including local TV coverage of a  
 571 special public session on the Icelandic eruptions and impacts, with presentations by Chris Hayward, Siwan  
 572 Davies, and Thor Thordarson) and some headaches for travel arrangements (Holt and Lowe, 2010). Of the 76  
 573 participants in attendance from institutions in 12 countries, a substantial proportion (25) comprised students.  
 574 At the start of the conference, two consecutive public lectures to an audience of around 800 in Kirishima City  
 575 Hall were given by David Lowe (‘Connecting with our past: using tephtras and archaeology to date the  
 576 Polynesian settlement of Aotearoa/New Zealand’), Lowe’s talk being translated into Japanese whilst he spoke,  
 577 and Hiroshi Machida (‘Widespread tephtras originating from Kagoshima occurring in northeast Asia and  
 578 adjacent seas’).

579 New work on the tephrostratigraphic record of ice cores was presented as well as new protocols  
 580 involving electron probe microanalysis (EPMA), and laser-ablation inductively-coupled plasma mass  
 581 spectrometry (LA-ICP-MS) analysis, of glass shards considerably smaller than previously attainable (~5 and  
 582 ~10 µm in diameter, respectively). The revolutionary rise of Bayesian age-depth modelling, which has helped



583 to dramatically improve age frameworks for tephra and cryptotephra, was also reported (e.g., Blockley et al.,  
 584 2007; Lowe et al., 2008b; Bronk Ramsey et al., 2015a; Blaauw et al., 2018).

585 An influential letter was written during the conference by the COT president and secretary on behalf  
 586 of INTAV to the Secretariat of the Japan Geopark Committee. Signed by more than 50 conference  
 587 participants, the letter supported the application by Kirishima City for the Kirishima volcano system  
 588 ('Kirishima Mountains') to become an accepted member of Geoparks Japan as Kirishima Geopark. The park  
 589 was successfully certified later that year.

590 The meeting also featured two days in the field, on the first of which participants witnessed several  
 591 small eruptions of Sakurajima (Fig. 8). A three-day post-conference field trip across Kyushu was held as well,  
 592 and included visits to Unzen volcano, Aso caldera, and Kuju and Yufu-Tsurumi volcanoes. Unusually,  
 593 participants on the post-conference trip were given a small refund at the end, such was the efficiency of the  
 594 leaders.

595

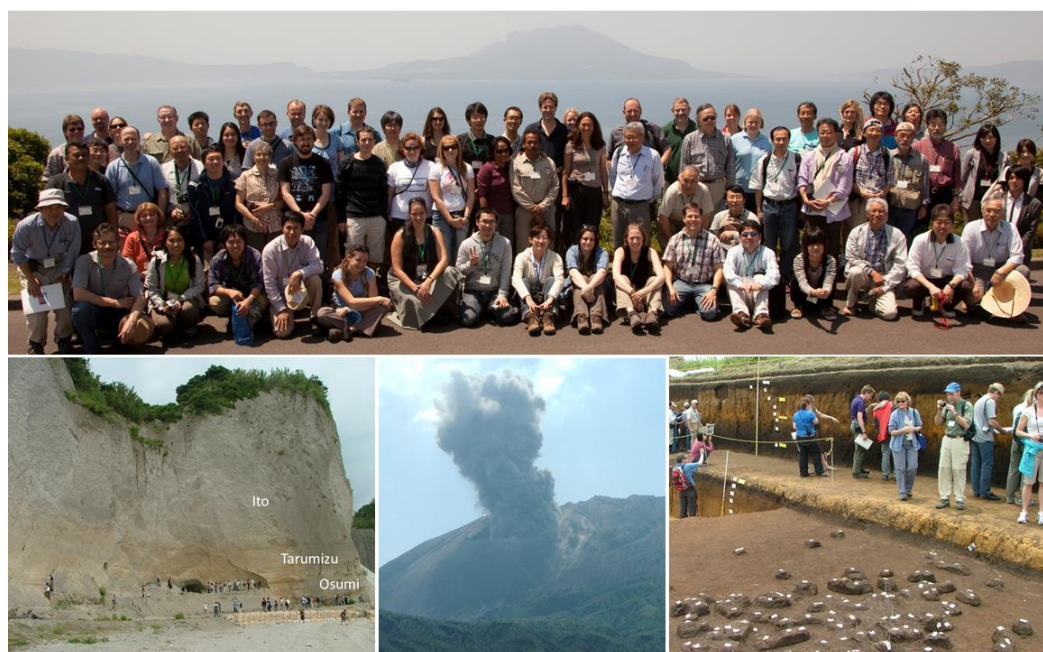

596

597 **Figure 8. (Upper)** Participants of the 'Active Tephra' meeting held in Kirishima in May, 2010, in the field on  
 598 Kyushu, Japan. Sakurajima volcano (just visible in the background) erupted later that day during the trip (see  
 599 below) (from Lowe et al., 2011a, p. 2). Photo: Koji Okumura. **(Lower) (Left)** Thick coastal exposure of Aira  
 600 tephra formation (erupted ~ 30 cal ka from Aira caldera) near Fumoto on the eastern coast of Kagoshima Bay  
 601 and visited 13 May, 2010. Initial deposits comprise plinian fall deposits (Osumi pumice) overlain by thin  
 602 stratified (intra-plinian) pyroclastic flow deposits (Tarumizu ignimbrite) and then by thick, mainly non-welded  
 603 ignimbrite, Ito ignimbrite (bulk volume  $>450 \text{ km}^3$ ). Ito ignimbrite is coeval with a widespread co-ignimbrite  
 604 ash, first recognised in 1976, named Aira-Tanzawa ash (Aira-Tn) (Machida and Arai, 2003). Photo: David  
 605 Lowe. **(Middle)** Small vulcanian eruption from active Showa crater (Minamidake crater), Sakurajima volcano,



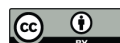

one of two witnessed just a few minutes after participants arrived at the stop (12 May, 2010). Such impressive ‘organisation’ was greatly admired by all! Photo: David Lowe. (*Right*) Participants examining Holocene tephra and humic buried soil horizons at Tenjindan archaeological site of Joman era on Osumi Peninsula near Kagoshima Bay, southern Kyushu, on the mid-conference field trip (13 May). The bright yellowish-orange tephra about 1.2 m below the land surface is Kikai-Akahoya tephra aged ~7.3 cal ka. Artefact locations are marked with tags in the foreground (Moriwaki and Lowe, 2010). Photo: David Lowe.

The conference proceedings, published in *Quaternary International* and comprising a record 31 scientific papers (Lowe et al., 2011b), were dedicated to the memory of Shinji Nagaoka (Moriwaki et al., 2011a). The then editor-in-chief for *Quaternary International*, Norm Catto, described the papers from the Kirishima meeting as part of an “outstanding *QI* volume” and “one of the most commonly downloaded through the Elsevier website” (Norm Catto personal communication, 2013). The volume paid specific tribute to the leading researcher of his generation in Japan, Hiroshi Machida. Of him, Suzuki et al. (2011, p. 6) stated: “Perhaps more than any other geoscientist from Japan, Hiroshi carried the insights and advances of tephra studies and their application in palaeoenvironmental and archaeological research, landscape processes, and volcanology and hazard analysis, to the outside world through a succession of papers and books written in English and through conference presentations”. Machida followed initially in the large footprints of Kunio Kobayashi, who, as well as founding COT, had a similarly compelling, outward-looking role in the 1960s and early 1970s through his development of methods to characterize tephra both in the field and petrographically, and by publishing papers in English to widen their impact (e.g., Kobayashi and Shimuzu, 1962; Momose et al., 1968; Kobayashi, 1969, 1972). Kobayashi also encouraged scientists from countries other than Japan to become involved in promoting tephra studies, including through appointment to COT’s executive committee (John Westgate personal communication, 2021).

### 2.3.9. Moieciu de Sus, Romania, 2018

There was an eight-year period before the next tephra meeting, the ‘Tephra Hunt in Transylvania’ conference held (under the auspices of INTAV) in the Cheile Gradistei Fundata Resort near Moieciu de Sus and set in the dramatic landscapes of the south Carpathian Mountains of Romania. Prior to this meeting, the INTAV committee members for some years had been working on holding a meeting in Chile and Argentina, but changes in circumstances for key personnel meant that it had to be shelved in 2016. The Transylvania meeting, with a theme of ‘Crossing new frontiers’, is the largest tephra meeting of the commission held thus far (Table 2): 92 participants from institutions in 21 countries attended, including 22 students (17 of whom were undertaking PhDs) (Lowe, 2018b). With nearly 100 attending, around double the number of countries normally represented, and the robust mix of senior, experienced, and emerging researchers, this meeting might be considered a ‘coming of age’ for INTAV. It included four days in the field – a one-day mid-conference trip that took in a memorable visit to Bran Castle and a three-day post-conference trip with 32 participants – as well as a public lecture where the complex geological setting of the region was introduced by Ioan Seghedi. A workshop for several dozen participants on Bayesian age modelling was led by Maarten Blaauw (Fig. 9).

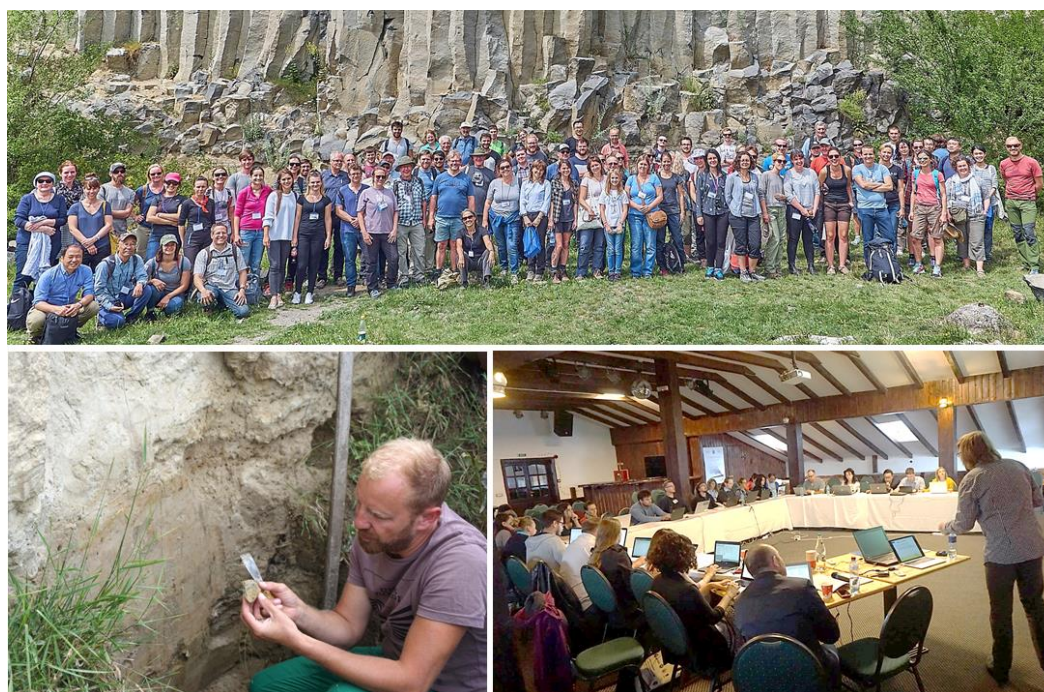

**Figure 9. (Upper)** Participants of the Transylvanian ‘Tephra Hunt’ conference in the Perșani volcanic field on 26 June, 2018, in the southern Carpathians, Romania, during the mid-conference field trip (from Abbott et al. 2020a, p. 2). Photo: Pierre Oesterle. **(Lower)** (Left) A distal occurrence of Y5 tephra, about 0.6 m thick, associated with the Campanian Ignimbrite eruption c. 39–40 ka of the Campi Flegrei field (Italy), within loess on the Wallachian plains in southeast Romania near the Buzău River. Dan Veres is directly alongside the darker, slightly pinkish, fine-grained Y5 tephra deposit. Photo: David Lowe. (Right) Maarten Blaauw (far right) leading a Bayesian age-modelling workshop during the conference on 27 June, 2018. Such workshops (on various topics) have been a feature of a number of tephra meetings, in some cases the main focus (e.g., Tokyo, 1993; Portland, 2014 and 2017). Photo: David Lowe.

Faithfully following the commission’s enduring and important philosophy, only one session of oral papers was run during the Romanian conference (i.e., no parallel sessions were held) so that all participants could see all the talks and thereby support ECRs as well as taking in keynote and other oral presentations. In addition, the organisers placed equal value on poster papers, with all posters being displayed for the entirety of the conference, and they were featured in stand-alone poster presentation sessions. The special volume of ensuing papers, published as a double issue of the *Journal of Quaternary Science* (Abbott et al., 2020b), includes 27 scientific articles and was entitled ‘Crossing new frontiers: extending tephrochronology as a global geoscientific research tool’. The volume was dedicated to the memory of Richard Payne (Abbott et al., 2020a; Bunting et al., 2020).





## 669 2.4 Other activities of COT

670

671 As well as the nine stand-alone, specialist tephra meetings described above, tephrochronologists of COT have  
 672 been active since the 1960s in convening and running tephra-focussed sessions or symposia, or leading field  
 673 trips, in association with various commissions or full congresses of INQUA or IAVCEI (e.g., Smith, 1986;  
 674 Eden and Furkert, 1988; Saito et al., 2016; Lane et al., 2017b; Hopkins et al., 2021a; Scott, 2021), or in  
 675 conjunction with PAGES (Past Global Changes) (e.g., Hall and Alloway, 2004) or other organisations such as  
 676 the International Geological Congress (IGC) or the National Science Foundation (NSF) of USA.

677 COT members have also been heavily involved in a range of projects including the highly successful  
 678 INTIMATE Project (which was launched for the North Atlantic region at the 1995 Berlin INQUA Congress)  
 679 in which tephrochronology has played a pivotal role (e.g., Davies et al., 2002, 2012; Turney et al., 2004a, b;  
 680 Alloway et al., 2007; Lowe et al., 2008b; Lowe et al., 2008; Moriwaki et al., 2011b; Barrell et al., 2013;  
 681 Blockley et al., 2014). In addition, studies on tephra or cryptotephra have featured at numerous national or  
 682 regional meetings or specialist workshops (e.g., Smalley, 1980; Howorth et al., 1981; Suzuki and Nakamura,  
 683 2005; Dugmore et al., 2011; Benediktsson et al., 2012a; Austin et al., 2014a). Some of these meetings were  
 684 built around multi-disciplinary projects such as SMART (Synchronising Marine And ice-core Records using  
 685 Tephrochronology), which was one of the first systematic projects investigating the cryptotephra record  
 686 preserved within North Atlantic marine deposits (Austin et al., 2014b), and the RESET project (RESponse of  
 687 humans to abrupt Environmental Transitions) (Lowe et al., 2015).

688 Examples (not comprehensive) pertaining mainly to INQUA congresses, or specific commissions  
 689 where field trips and sessions (symposia) involving aspects of tephrochronology were featured, include the  
 690 following:

- 691 • 1965 INQUA Congress in Boulder (tephra session/s; field trips in Pacific Northwest, central-south  
 692 Alaska) (Neustadt, 1969)
- 693 • 1969 INQUA Congress in Paris (tephra session/s; field trip in Massif Central) (Neustadt, 1969)
- 694 • 1973 INQUA Congress in Christchurch (tephra session/s; field trips in western North Island, central  
 695 North Island) (Fairbridge, 1974)
- 696 • 1977 INQUA Congress in Birmingham (tephra session/s)
- 697 • 1986 IAVCEI International Volcanological Congress in Auckland-Hamilton-Rotorua (sessions on  
 698 explosive volcanism, tephrochronology; field trips in North Island, e.g., Houghton and Wilson, 1986)
- 699 • 1987 New Zealand conference, Western Pacific Working Group of INQUA Loess Commission (field  
 700 trip including North Island, e.g., Smalley and O'Hara-Dhand, 2010)
- 701 • 1987 INQUA Congress Ottawa (tephra session; advent of ICCT)
- 702 • 1990, 1992, 1994 Biennial UK Tephra Meetings in Edinburgh (1990), Belfast (1992), and Cheltenham  
 703 (1994) (e.g., Hunt, 1999a)
- 704 • 1991 INQUA Congress in Beijing (tephra session/s)



- 705 • 1992 IGC Tephra and volcanological meeting, Mt Tateyama, Japan
- 706 • 1995 INQUA Congress in Berlin (tephra session/s; field trip in Eifel Volcanic Field)
- 707 • 1999 INQUA Congress in Durban (tephra session/s; formalising link between S/COTAV and
- 708 INTIMATE Project; e.g., Turney et al., 2004a)
- 709 • 2000 4<sup>th</sup> International INTIMATE Workshop, INQUA Palaeoclimate Commission and COTAV,
- 710 Kangerlussuaq, Greenland (e.g., Turney et al., 2004b)
- 711 • 2003 INQUA Congress in Reno (tephra session/s; launch of Australasian INTIMATE Project, e.g.,
- 712 Shulmeister et al., 2006)
- 713 • 2005 NSF Revealing Hominid Origins Initiative, International Tephra Working Group Workshop, Santa
- 714 Fe, New Mexico (WoldeGabriel et al., 2005)
- 715 • 2007 INQUA Congress in Cairns (tephra sessions; field trip in Atherton Tablelands)
- 716 • 2011 INQUA Congress in Bern (tephra sessions)
- 717 • 2012 Tephra and Archaeology – Chronological, Ecological and Cultural Dimensions Symposium,
- 718 Annual Meeting of European Association of Archaeologists, Helsinki
- 719 • 2015 INQUA Congress in Nagoya (tephra sessions; numerous field trips)
- 720 • 2017 IAVCEI Scientific Assembly in Portland, Oregon ('Best Practices' tephra workshop)
- 721 • 2019 INQUA Congress in Dublin (tephra sessions) (see Sect. 7 below)
- 722 • 2021 American Geophysical Union AGU21 Fall Meeting (tephra session).

723

### 724 **3 Officers of COT and their roles, members, key periods in COT's development, and funding since 2007**

725

#### 726 **3.1 Officers of COT**

727

728 Until the Nagoya INQUA Congress in 2015, the commission committees (also called executives) usually  
 729 comprised three officers elected to serve the needs of COT: a president, vice-president, and secretary (Table  
 730 3). A total of 29 different people have filled the committee roles over the past 60 years, representing nine  
 731 countries. Twenty-two officers have represented just four countries: UK (8 officers), New Zealand (5), USA  
 732 (5), and Japan (4). Around half (14) of the officers have served eight years or more, the longest serving being  
 733 Kunio Kobayashi (12 years), Takehiko Suzuki (12 years), and David Lowe (16 years).

734

735

736

737

738

739

740



**Table 3.** List of officers of COT/S, CEV, ICCT, COTAV, SCOTAV, or INTAV\*.

| Inter-congress period | Name <sup>1</sup> | President                                             | Vice-president (VP)    | VP                                                         | VP                                      | Past-president (PP)          | VP (ECR rep)       |
|-----------------------|-------------------|-------------------------------------------------------|------------------------|------------------------------------------------------------|-----------------------------------------|------------------------------|--------------------|
| 2019-on <sup>2</sup>  | COT (IAVCEI)      | Britta Jensen (CA) <sup>3</sup>                       | Peter Abbott (CH)      | Ian Matthews (UK)                                          | Paul Albert (UK)                        | Takehiko Suzuki (JP)         | Jenni Hopkins (NZ) |
|                       |                   | <b>President</b>                                      | <b>VP</b>              | <b>VP</b>                                                  | <b>VP</b>                               | <b>PP</b>                    |                    |
| 2015-2019             | INTAV             | Takehiko Suzuki (JP)                                  | Britta Jensen (CA)     | Peter Abbott (UK)                                          | Victoria Smith (UK) + Siwan Davies (UK) | David Lowe <sup>4</sup> (NZ) |                    |
|                       |                   | <b>President</b>                                      | <b>VP</b>              | <b>Secretary</b>                                           |                                         |                              |                    |
| 2011-2015             | INTAV             | David Lowe (NZ)                                       | Takehiko Suzuki (JP)   | Victoria Smith (UK)                                        |                                         |                              |                    |
| 2007-2011             | INTAV             | Siwan Davies (UK)                                     | Phil Shane (NZ)        | David Lowe (NZ)                                            |                                         |                              |                    |
| 2003-2007             | SCOTAV            | Chris Turney (AU)                                     | Siwan Davies (UK)      | Brent Alloway (NZ)                                         |                                         |                              |                    |
| 1999-2003             | COTAV             | Etienne Juvigné (BE)                                  | Valerie Hall (UK)      | Chris Turney (UK)                                          |                                         |                              |                    |
| 1995-1999             | COTAV/ COTS       | James Begét (US)                                      | Etienne Juvigné (BE)   | Valerie Hall (UK)                                          |                                         |                              |                    |
| 1991-1995             | COT               | Hiroshi Machida (JP)                                  | James Begét (US)       | David Lowe (NZ)                                            |                                         |                              |                    |
| 1987-1991             | ICCT              | John Westgate (CA)                                    | Hiroshi Machida (JP)   | Paul van den Bogaard (DE)                                  |                                         |                              |                    |
| 1982-1987             | CEV (IAVCEI)      | Bruce Houghton (NZ) <sup>5</sup><br>Grant Heiken (US) |                        | Colin Wilson (NZ)<br>Wolf Elston (US)<br>Stephen Self (US) |                                         |                              |                    |
| 1977-1982             | COT               | Stephen Sparks (UK) <sup>5</sup>                      |                        | Stephen Self (US)                                          |                                         |                              |                    |
| 1973-1977             | COT               | Dragoslav Ninkovitch (US)                             | Yoshio Katsui (JP)     | Colin Vucetich (NZ)                                        |                                         |                              |                    |
| 1969-1973             | COT               | Kunio Kobayashi (JP)                                  | (?) Sohei Kaizuka (JP) | John Westgate (CA)                                         |                                         |                              |                    |
| 1965-1969             | COT               | Kunio Kobayashi (JP) <sup>6</sup>                     |                        |                                                            |                                         |                              |                    |
| 1961-1965             | COT               | Kunio Kobayashi (JP) <sup>6</sup>                     |                        |                                                            |                                         |                              |                    |

\* For abbreviations see Table 1. Gaps indicate non appointment

<sup>1</sup> Affiliated with INQUA except where noted (with IAVCEI)

<sup>2</sup> Interim committee to support the transition to IAVCEI

<sup>3</sup> CA, Canada; NZ, New Zealand; JP, Japan; IS, Iceland; CH, Switzerland; BE, Belgium; DE, Germany; UK, United Kingdom; US, United States of America

<sup>4</sup> David Lowe has been emeritus advisor to the committee since 2019

<sup>5</sup> IAVCEI commissions at this time comprised two officers. Sigurdur Thórarinnsson held an honorary president role in COT from 1977–82 (Self and Sparks, 1981a; Elston and Heiken, 1984)

<sup>6</sup> Up until 1969, the COT executive evidently comprised only a president

There has been ongoing support for COT through elected officers since the 1990s as new generations have emerged, including from the increasing numbers of cryptotephra specialists. However, it must be said that to join the commission as an officer does entail dedication and, at times, intense bursts of work – such as developing, promoting, organising, and enacting specialist field conferences or tephra symposia at the INQUA congresses. Within IAVCEI, it is an expectation that normally a meeting is held by commissions within each inter-congress period, i.e., roughly every four years. As well as organising these meetings, officers of the commissions have hosted business meetings for commission members, acquired funding (see Sect. 3.4 below), developed and hosted websites, and, as editors, typically led the publication of articles following conferences in proceedings comprising special collective issues of journals or books.



763 In 2015, the INTAV committee was expanded to five officers: a president, an immediate past-  
 764 president, and three vice-presidents (Table 3). Partly this move was recognition that in the age of the internet a  
 765 secretarial role had become less pivotal, but the main reasons were to:

- 766 • enhance the general functioning capability of the committee to reflect a rapidly growing membership
- 767 • to help spread the increasing load relating to the acquisition of funding and associated compliance
- 768 • to develop capacity to cope with workload in the 2015–19 inter-congress period of simultaneously co-  
 769 organising the tephra meeting in Romania (2018) and the multiple tephra sessions planned for the  
 770 Dublin INQUA congress (2019)
- 771 • to provide editing support to the local organising committee to publish the 2018 conference-related  
 772 special issue (Abbott et al., 2020b)
- 773 • to widen the geographic representation and to include cryptotephra specialists
- 774 • maintain experience while concomitantly encouraging ECR-members and improving gender balance.

775

776

### 777 3.2 Members

778

779 Until the early- to mid-2000s, membership of the commission under INQUA protocol was somewhat complex  
 780 with several categories including officers, formal members, honorary members, and corresponding members,  
 781 the last representing by far the bulk of the membership. Formal members, usually respected specialists or  
 782 allied practitioners (such as palynologists or volcanologists) who applied tephrochronology closely to their  
 783 research, were limited in number – for example, just six were listed for the 1965–69 period (Neustadt, 1969,  
 784 p. 90) and nine were elected at the Christchurch INQUA Congress in 1973 (Kaizuka, 1974, p. 80). (Honorary  
 785 members are discussed below in Sect. 5.)

786 From around 2002, membership was simplified and email lists of members were developed,  
 787 amalgamating formal and corresponding members into a single email group (see also Sect. 6). The process  
 788 began with the advent of the ‘TEPHRA’ group of JISCMail (a national academic mailing list service in the  
 789 UK) on 4 March, 2002, which was set up by Chris Turney (based in Queen’s University, Belfast, at the time).  
 790 The purpose was to facilitate discussion around tephra issues as tephrochronology (involving cryptotephra)  
 791 began expanding in the UK and beyond. Membership was then widened by Siwan Davies on 11 November,  
 792 2005, following a tephra workshop in Swansea in April, 2005, to include SCOTAV members globally, the aim  
 793 being “to provide an important [international] forum for increased interaction and discussion amongst those  
 794 involved with tephra studies.” Thus, JISCMail (Tephra) became the default membership list for SCOTAV and  
 795 INTAV after 2007 (Lowe, 2008). When issues or queries required membership input or voting, members were  
 796 notified via JISCMail. Today, under IAVCEI rules, members must formally sign up to COT within IAVCEI,  
 797 and pay a membership fee (which include a reduced-fee option for ECRs).

798

799



### 800 3.3 Key periods and circumstances in the development of COT

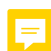

801

802 After the 1980 Iceland meeting, the need for COT was questioned. Some considered that COT “had reached  
 803 its goals of communicating the utility of tephrochronology and tephra studies to the scientific community”  
 804 (chiefly with publication of Westgate and Gold, 1974, and Self and Sparks, 1981) (Elston and Heiken, 1984).  
 805 Realization that research on explosive volcanism was rapidly expanding at this time led the secretary of COT  
 806 to propose (in December, 1982) that some members of the commission could serve as a nucleus for a  
 807 proposed Working Group (WG) on Explosive Volcanism within IAVCEI. A proposal for such a working  
 808 group was submitted to the IAVCEI Secretariat at the International Union of Geodesy and Geophysics  
 809 (IUGG) meeting in Hamburg in August, 1983. The IAVCEI Executive Committee officially approved  
 810 adoption of the WG at the Hamburg meeting (Elston and Heiken, 1984; Schmincke, 1989, p. 234), and Grant  
 811 Heiken was appointed president and Stephen Self secretary. Self was replaced in 1984 by Wolfgang (‘Wolf’)  
 812 Elston. Sometime after, the WG was renamed the Commission on Explosive Volcanism (CEV). Bruce  
 813 Houghton (president) and Colin Wilson (secretary) led the CEV from 1986 following their pre-eminent roles  
 814 in the highly successful IAVCEI International Volcanological Congress (centenary of 1886 Tarawera  
 815 eruption) held in New Zealand in February, 1986 (Schmincke, 1989). Retirements or passing of some of the  
 816 early protagonists of COT may have had an impact on this shift from INQUA to IAVCEI in the early 1980s. It  
 817 seems possible also that the long hiatus since the first COT meeting in 1964 could have been another catalyst  
 818 for change.

819 In 1987, however, at the INQUA Congress at Ottawa, several persons, especially those from Japan,  
 820 expressed the view that the needs of tephrochronologists were not being met under IAVCEI. It was decided at  
 821 this meeting to make a request to the INQUA Executive Committee for reinstatement of COT. John Westgate  
 822 convened a meeting at the conclusion of the tephra symposium in Ottawa and prepared a document justifying  
 823 this wish. He presented it to the INQUA Executive Committee the next day. The executive decided to  
 824 reinstate this group but under the title ‘Inter-Congress Committee on Tephrochronology’ (ICCT). There would  
 825 be a trial period of inter-congress length and a decision to elevate to a full commission would be made at the  
 826 next INQUA Congress. Looking back, it might seem this was a bit harsh, but a more objective view is that  
 827 COT’s first quarter of a century might be characterized as somewhat below par with only two field meetings  
 828 (1964, 1980), albeit tempered with a strong presence by COT at the INQUA Congress in Christchurch (1973)  
 829 and publication of Westgate and Gold (1974) and Self and Sparks (1981). In any event, the formation of ICCT  
 830 in 1987 can be seen as a turning point for COT: the election of a full complement of officers in 1987 under  
 831 Westgate’s leadership, the successful tephra meeting in Mammoth in 1990, and the subsequent volume of  
 832 ensuing papers (including the new tephra characterization protocols of Froggatt, 1992) edited by Westgate et  
 833 al. (1992b), collectively demonstrated a renewed and strong commitment by ICCT and enabled COT to be  
 834 restored as a formal commission of INQUA in Beijing in 1991 (Lowe, 1996a).

835 The momentum was maintained with the PAGES-COT ‘Climatic impact of volcanism’ meeting held  
 836 in Japan in December, 1993, the triple-discipline meeting held only a few months later in New Zealand in



February, 1994, and the meeting held in France in July-August, 1998 (Table 2). At the same time, cryptotephra studies of the modern era (noted earlier) were advancing at pace (e.g., Pilcher and Hall, 1992, 1996; Merkt et al., 1993; van den Bogaard et al. 1994; Pilcher et al., 1995; Dugmore et al., 1996) and so a new cohort of graduate students (working on cryptotephra) was training in parallel to the more traditional graduates developing skills and expertise relating to visible tephra and associated deposits in volcanic countries (Froese et al., 2008a). It is also noteworthy that, following on from Froggatt's (1992) recommendations, John Hunt and Peter Hill undertook in the 1990s the first interlaboratory comparison exercise involving EPMA, targeting data quality, testing glass standards (including Lipari obsidian), and evaluating reproducibility (Hunt and Hill, 1993, 1996, 2001; Hunt et al., 1998).

The 2010 Active Tephra meeting in Kirishima, Japan, may thus be viewed as another turning point for COT, described as a 'step-change' in tephrochronology by Lowe et al. (2011a), because by then, or soon after, many cryptotephra specialists were graduating, some taking up research and/or lecturing positions, and therefore helping to develop new directions for research including in the marine environment and in ice cores. Thus an increasingly global outlook began to accelerate from around that time (Davies, 2015; Lane et al., 2017a).

We mentioned earlier that new dating techniques were reported at the 1990 Mammoth meeting, and also Bayesian age modelling (built around ever-improving  $^{14}\text{C}$ -calibration curves and other age data, most recently including zircon double dating) was featured at the 2010 Kirishima meeting. These techniques, alongside improving and new analytical techniques for glass shards, especially involving EPMA and LA-ICP-MS that were developing through the 1990s and the 2000s, provided further drive to enable tephra and cryptotephra studies to flourish (e.g., Westgate et al., 1994; Hunt et al., 1998; Pearce et al., 1999, 2011, 2014; Platz et al., 2007; Kuehn et al., 2011; Hayward, 2012; Pearce, 2014; Tomlinson et al., 2015; Danišik et al., 2020). In particular, the need to date glass shards in distal or ultra-distal settings, where inappropriate or no mineral grains were present, helped lead to the critical development of the IPTFT method. Moreover, the requirement to be able to analyse very small glass shards accurately (such as in ultra-distal ice cores) led to the development of improved probe and LA-ICP-MS methods in cryptotephra studies (Alloway et al., 2013; Lowe et al., 2017a).

Thus by the time the most recent commission meetings were held in 2015 (Nagoya, Japan), 2017 (Portland, USA), 2018 (Moieciu de Sus, Romania), and 2019 (Dublin, Ireland), the contributions of participants in the discipline were wide ranging and detailed, i.e., the new research had both breadth and depth. A survey undertaken of commission members in 2017 (as part of an EXTRAS funding application to INQUA) showed that ECRs and PhD students made up a healthy 39% of respondents, balanced by 53% of established or senior scientists (along with 8% of researchers associated with developing countries). Creditably, female tephrochronologists amounted to 39% of respondents at that time (cf. male 61%). We speculate that this gender imbalance may have tilted further towards an even more equitable status since the survey in 2017.



#### 874 3.4 Funding acquired by INTAV since 2007 and its expenditure

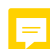

875

876 The commission officers have always had to bid for funding, primarily from INQUA and also from PAGES.  
 877 Funding and in-kind support have also been acquired from numerous geo-institutes, universities, city councils,  
 878 and private companies relating to the hosting of events in various cities or countries. These funds have been  
 879 used to support specialist meetings and/or for publishing special COT-endorsed volumes, such as Westgate  
 880 and Gold (1974), or conference proceedings such as Juvigné and Raynal (2001b). Since 2007, support from  
 881 INQUA, especially through successive presidents of SACCOT until 2018, has been greatly appreciated,  
 882 particularly financial support (approximately €35,000 in total from 2009–2018) that mainly helped ECRs  
 883 attend the international field conferences and specialist (tephra skills) workshops as follows:

- 884 • full tephra field meeting in Kirishima, Japan in May, 2010 (supported also by PAGES: Lowe, 2011b)
- 885 • Bayesian age-modelling workshop in San Miguel de Allende, Mexico, led by Maarten Blaauw in  
 886 August, 2010 (supported also by PAGES: Blaauw et al., 2011)
- 887 • INTAV/TIQS Tephra in Quaternary Science workshop on the Eyjafjallajökull eruption of Iceland in  
 888 Edinburgh, UK, led by Andrew Dugmore in May, 2011 (Dugmore et al., 2011)
- 889 • two tephra workshops in Portland, USA, in August, 2014, and August, 2017 (Kuehn et al., 2014;  
 890 Bursik et al., 2017) (<https://vhub.org/search/?terms=tephra+workshops>) (see Sect. 7.1 below)
- 891 • full tephra field meeting in Moieciu de Sus, Romania, in June-July, 2018 (Karátson et al., 2018).

892

893 Considerable efforts have been needed to justify the continuation of the focus group (INTAV) to  
 894 INQUA in the form of annual reports, bidding for and reporting on the INTREPID and EXTRAS projects; as  
 895 a condition of funding, reports were also required for *Quaternary Perspectives*, the INQUA newsletter (e.g.,  
 896 Lowe, 2013, 2015, 2018a, b). With this past support and long history with INQUA, the decision to move the  
 897 commission to IAVCEI was not taken lightly. However, the increased burden of maintaining some version of  
 898 COT within INQUA, the continual need to justify its existence annually, and the loss of a structural model  
 899 within which it could exist as a coherent, ongoing group (noted earlier) ultimately led to this decision.  
 900 Additionally, the move to IAVCEI in 2019 was to allow for stability and a more predictable workload for the  
 901 executive. It is emphasised that cooperation and involvement in quadrennial INQUA congresses are not  
 902 precluded. Unfortunately, the rapid emergence of COVID-19 in 2020, and its commensurate impacts, have  
 903 severely limited planning and future activities with the next specialist tephra meeting, originally planned for  
 904 2020/2021, being indefinitely delayed. A tephra symposium and other activities planned for the next IAVCEI  
 905 Scientific Assembly, ostensibly being held in Rotorua, New Zealand, in late January/early February, 2023  
 906 (Scott, 2021), are also uncertain.

907

908

909





#### 910 **4 Aims of COT – then and now**

911

912 Prior to the 1961 Warsaw INQUA Congress, Kunio Kobayashi’s pre-congress proposal for a COT included  
 913 several broad aims, namely to develop tephrochronology and apply it to Quaternary research and to meet to  
 914 report and discuss findings from different countries (as noted in Sect. 2.1). After the conference, he expanded  
 915 on these aims, key aspects being to advance the principles of tephrochronology as well as methodology, to  
 916 develop a global inventory (with regional maps) of the distribution of tephtras including in the oceans, and to  
 917 determine the numerical ages of tephtras (Neustadt, 1969, p. 90). It is of interest that Kobayashi (1965, p. 786),  
 918 after discussions in person with Prof. Josef Frechen, a tephrochronologist in Germany, compiled a list with  
 919 several more potential objectives, some presciently, including:

- 920 • study of widely distributed tephra deposits, such as thin ash layers in the Greenland ice sheet and in
- 921 marine sediments, derived from very explosive, large-volume eruptions
- 922 • developing microscopic methods to try to recognise the existence of tephra materials “even if they are
- 923 in least [sparse] amounts”
- 924 • developing diagnostic petrographic and palaeomagnetic features on lavas to provide a basis for
- 925 correlating related (co-magmatic) tephtras
- 926 • undertaking weathering studies on glass and associated clay minerals and hence evaluating potential
- 927 environments of deposition
- 928 • holding regular workshops/conferences to discuss ideas and compare findings.

929

930 Although the aim of COT can now be expanded to include a re-awakened focus on volcanic studies  
 931 (although these have remained an important aspect in currently/recently active volcanic countries such as New  
 932 Zealand, Iceland, Indonesia, Chile, USA, and Japan, e.g., Crandell and Mullineaux, 1978; Heiken and  
 933 Wohletz, 1987; Lowe, 1988; Machida, 1991, 2002; Begét et al., 1994; Pilcher et al., 1995; Lowe et al., 2002;  
 934 Smith et al., 2005; Waitt and Begét, 2009; Óladóttir et al., 2012; Tatsumi and Suzuki-Kamata, 2014; Cashman  
 935 and Rush, 2020; Pearce et al., 2020; Romero et al., 2021), the means to achieve this aim broadly remain the  
 936 same.

937 In general terms, the aim is to improve or develop new methods and protocols of tephrochronology  
 938 (spanning field, analytical, geochronological, and digital/internet realms) to support and facilitate wide-  
 939 ranging Quaternary research initiatives ranging from paleoenvironmental reconstruction to archaeology and  
 940 paleoanthropology, as well as geochronological and volcanological applications. In addition, enhancing the  
 941 global capability of tephrochronology for future research by training and mentoring emerging researchers  
 942 remains paramount within the aims of the modern-day (post-2019) COT (Lowe et al., 2018).

943 The seven objectives of the (now-completed) EXTRAS project provide a useful summary of the current  
 944 major aims of COT in greater detail. We have added a new objective, number 5 listed below, along with  
 945 several relevant supporting references:



1. To evaluate and apply new and emerging technologies to identify and map proximal-to-distal, and ultra-distal, tephra and cryptotephra deposits, and to establish their spatial and stratigraphic interrelationships to facilitate their use as chronostratigraphic units (including within loess, ice, and other sedimentary deposits, and in soils/paleosols) and as a basis for documenting and enhancing volcanic eruption histories;
2. To develop and evaluate new and emerging methods to characterize tephra and cryptotephra constituents mineralogically and geochemically (including isotopically) using formalised protocols that enhance data quality and quantity;
3. To develop improved age models for tephra and cryptotephra deposits, including via Bayesian modelling, and hence improve existing age models for key volcanic, palaeoclimatic, archaeological, sedimentary and other sequences using tephra and cryptotephra as appropriate;
4. To evaluate and develop objective ways of correlating tephra and cryptotephra deposits from place to place using statistical techniques and numerical measures of probability of correlation;
5. Recognising and mapping transformed tephra deposits (i.e., that have undergone morphological changes such as reworking, dislocation, or bioturbation) and hence evaluating new ways of reconstructing past environments using information provided by such transformations (e.g., Dugmore and Newton, 2012; Cutler et al., 2016; Blong et al., 2017; Dugmore et al., 2020; Thompson et al., 2021);
6. To develop regional and ultimately global databases of high-quality mineral, geochemical, and other data (stratigraphic, chronologic, spatial, bibliometric) for tephra and cryptotephra deposits;
7. To maintain and enhance the global capability of tephrochronology for future research through mentoring and training of emerging researchers (ECRs) in the discipline;
8. To improve education to the wider community (outreach) about tephrochronology and its application and relevance.

## 5 Life membership awards

During the ICCT period (1987–1991), one of the initiatives was to recognize more clearly those individuals who had made exceptional contributions to the discipline of tephrochronology. Ray Wilcox was the first member so elected at this time (John Westgate personal communication, 2021), recorded as an ‘honorary member’. A simplification of membership categories in the early 2000s (Sect. 3.2) then led to the development (by David Lowe) of the ‘honorary life member’ award (replacing ‘honorary member’), and Ray Wilcox and Colin Vucetich were the first two recipients. Another 13 recipients have been awarded honorary life membership since 2007, all under INTAV (Table 4). The 15 life members in total represent institutions in eight countries.



**Table 4.** Honorary life members of COT or INTAV and the year of their award

|                                                     |
|-----------------------------------------------------|
| James Begét (USA) – 2015                            |
| Andrew Dugmore (UK) – 2014                          |
| Siwan Davies (UK) – 2019                            |
| Valerie Hall (UK) (1946-2016) – 2011                |
| John Hunt (UK) – 2011                               |
| Étienne Juvigné (Belgium) – 2007                    |
| Guðrún Larsen (Iceland) – 2018                      |
| David Lowe (New Zealand) – 2018                     |
| Hiroshi Machida (Japan) – 2007                      |
| Hiroshi Moriwaki (Japan) – 2015                     |
| Vera Ponomareva (Russia) – 2014                     |
| Andrei Sarna-Wojcicki (USA) – 2007                  |
| Colin Vucetich (New Zealand) (1918-2007) – pre-2007 |
| John Westgate (Canada) – 2007                       |
| Ray Wilcox (USA) (1912-2012) – pre-2007             |

For the record, the life membership certificate (Fig. 10), designed by Betty-Ann Kamp, shows a schematic eruption plume representation based on the eruption of Mt Ruapehu stratovolcano (New Zealand) around 1230 h on 18 June, 1996 (see Lowe, 2011a, p. 108).

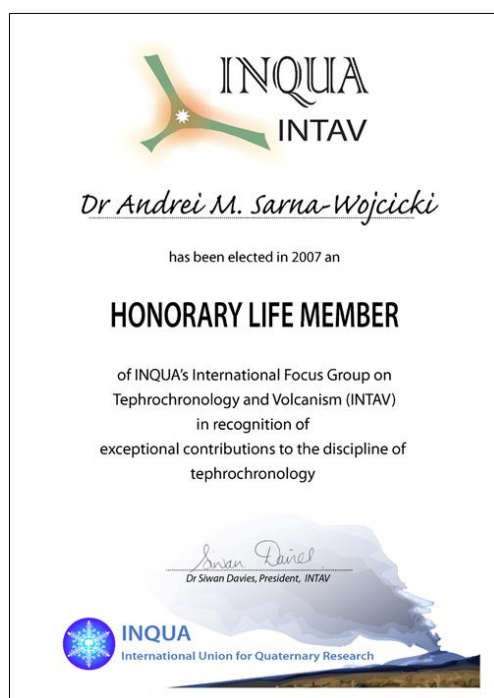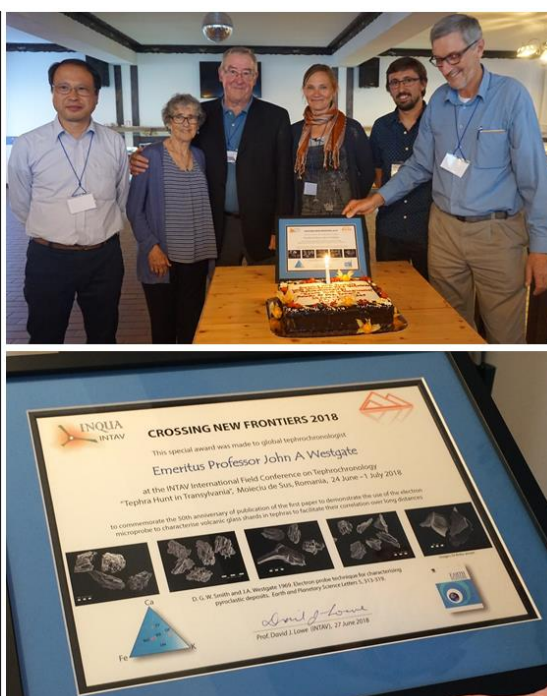

**Figure 10 (Left).** Example of a life member certificate of INTAV. **(Right) (Upper)** Special cake and unique certificate prepared for the ‘Tephra Hunt’ conference dinner (27 June, 2018) to commemorate the 50th anniversary of the publication of John Westgate’s pioneering paper on EPMA analysis of glass shards (Smith and Westgate, 1969). From left, Takehiko Suzuki, Cora and John Westgate, Britta Jensen, Peter Abbott, and



David Lowe. Photo: anonymous. (Lower) Close-up view of the commemorative certificate presented to John Westgate. The scanning electron microscope images of glass shards (provided by Britta Jensen) represent the North American tephra that Westgate analysed in undertaking this early seminal research (see Froese et al., 2008b). Photo: David Lowe.

1016

## 1017 **6 Communicating within COT and beyond**

1018

1019 Communication amongst members was originally by irregular newsletter, probably the most recent paper  
 1020 copies being physically posted from 1991–94 (Machida and, Lowe 1991; Lowe, 1992, 1994a). As described  
 1021 earlier in Sect. 3.2 on membership, the ‘TEPHRA’ group of JISCMail ([https://www.jiscmail.ac.uk/cgi-](https://www.jiscmail.ac.uk/cgi-bin/webadmin?A0=TEPHRA)  
 1022 [bin/webadmin?A0=TEPHRA](https://www.jiscmail.ac.uk/cgi-bin/webadmin?A0=TEPHRA)) was initiated by Chris Turney in 2002 and then broadened to global coverage  
 1023 by Siwan Davies in 2005 “for increased interaction and discussion amongst those involved with tephra  
 1024 studies.” That development, significantly, sparked a furious discussion about the terms ‘microtephra’ versus  
 1025 ‘cryptotephra’, kicked off by comments from John Lowe on 13 November, 2005. This email system is still  
 1026 being used today by members of COT (e.g., advertising PhD scholarships, forthcoming meetings, etc.). The  
 1027 archives have in fact been extraordinarily helpful in allowing us to provide some dates for events, names of  
 1028 people, etc., otherwise probably lost forever.

1029 JISCMail TEPHRA works alongside a Facebook page (<https://www.facebook.com/IAVCEICOT/>)  
 1030 that was set up by Peter Abbott on 19 August, 2015 (following discussion at the Nagoya INQUA Congress  
 1031 earlier that month), and a Twitter feed ([https://twitter.com/IAVCEI\\_COT](https://twitter.com/IAVCEI_COT)). A tephrochronology website has  
 1032 been in place since about 2002 (under SCOTAV), originally being established by Chris Turney (then at  
 1033 Queen’s University, Belfast, UK). It was subsequently hosted by Phil Shane (University of Auckland) from  
 1034 September 2008 to November 2011 (under INTAV), then by Victoria Smith (University of Oxford) until  
 1035 March 2017, and by Takehiko Suzuki (Tokyo Metropolitan University) from March 2017 until 2021. A new  
 1036 COT website, to be hosted by IAVCEI ([cot.iavceivolcano.org](http://cot.iavceivolcano.org)), is being developed and is to be launched in the  
 1037 near future.

1038

1039

## 1040 **7 Legacies and future**

1041

1042

1043 Key legacies from the pre-2019 commission that will be continued by the current COT include the  
 1044 organisation of regular stand-alone international tephra conferences – approximately every four years – that  
 1045 combine conference and field elements, together with workshops on specific topics and/or the development of  
 1046 certain skills. In addition, COT will continue convening sessions/symposia at large-scale meetings, such as the  
 1047 IAVCEI scientific assemblies (e.g., tephra skills workshop held in Portland in 2017) and INQUA congresses  
 1048 (e.g., two sessions on tephra studies were held in Dublin in 2019, together generating the largest number of  
 1049 papers of any group at that congress: Fig. 11), supporting smaller meetings and workshops, and reporting the  
 1050 results of tephrochronological studies in special issues of journals or books or specialist interactive websites.



Commission-supported or endorsed methodological research projects, such as those conducted by Froggatt (1992), Turney et al. (1994b), Hunt and Hill (1996), Suzuki (1996), Hunt et al. (1998), Kuehn et al. (2011), Pearce et al. (2014), and Suzuki et al. (2014), remain a high priority and we will continue to provide support for tephra-focused projects that require input from the community, as exemplified below in Sect. 7.1.

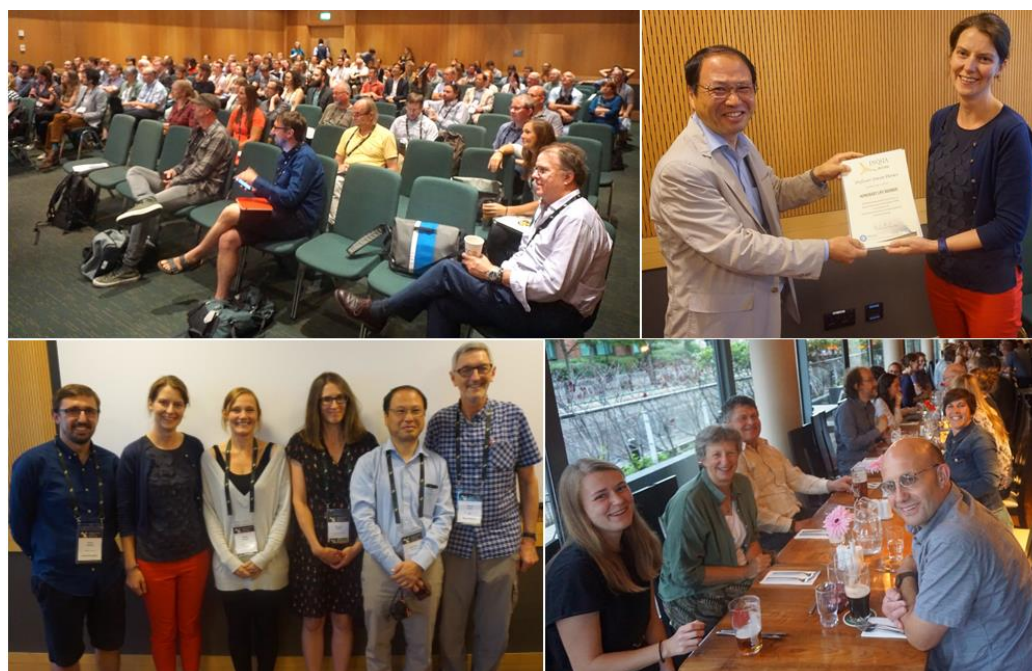

**Figure 11. (Upper) (Left)** Large audiences, reflecting the new vibrancy of INTAV/COT, were a feature of the two tephra sessions at the Dublin INQUA Congress in July, 2019. Photo: David Lowe. **(Right)** Takehiko Suzuki (INTAV president) presenting Siwan Davies with honorary life membership. **(Lower) (Left)** INTAV's last executive committee (2015–2019), photographed on 30 July, 2019, during the INTAV business meeting at the Dublin congress. From left, Peter Abbott, Siwan Davies (seconded to committee in August 2017), Britta Jensen, Victoria Smith (who resigned in February 2017 after ~5 years of service), Takehiko Suzuki, and David Lowe. Photo: anonymous. **(Right)** Tephrochronologists and volcanologists enjoying the special tephra dinner in Dublin. Photo: David Lowe.

## 7.1 Current projects and future initiatives

Two key projects that are currently being undertaken with the endorsement of COT are as follows:

- (1) *The development of 'best practices' protocols and databases* for undertaking all aspects of tephra studies, a project that began in 2014 (Kuehn et al., 2014). Initially led by Steve Kuehn, Marcus Bursik, Solène Pouget, Kristi Wallace, and Andrei Kurbatov, many others have now been involved in the project as well. Best practices recommendation spreadsheets were updated this year to version 3 (Abbott et al., 2021),





1074 and a manuscript which describes them has been revised and re-submitted for publication (Wallace et al.,  
 1075 in review). Since mid-2020, there is support for tephra in the StraboSpot field app (<https://strabospot.org>)  
 1076 and a tephra-specific help file (<https://strabospot.org/files/StraboSpotTephraHelp.pdf>). Staff of the Alaska  
 1077 Volcano Observatory of US Geological Survey have used the protocols now for two field seasons. A new  
 1078 tephra community portal was developed in 2021 in collaboration with the EarthChem data repository  
 1079 (<https://earthchem.org/communities/tephra/>), and this has templates for submitting sample information,  
 1080 analytical method information, and geochemical data. Recently updated examples of a ‘best practice  
 1081 dataset’, based on (i) Summer Lake and (ii) June Lake tephtras and their analyses, are available at Kuehn  
 1082 and Hostetler (2020) and Kuehn and Lyon (2020), respectively (see also Kuehn et al., 2021; Wallace et  
 1083 al., 2021). Steve Kuehn has 22 electron microprobe analysis method descriptors published with DOIs at  
 1084 EarthChem as the first of their kind using the new method-reporting format (Kuehn, 2021a, b).

1085

1086 (2) *A microbeam trace-element characterization project of tephra reference material*, led by Nick Pearce,  
 1087 John Westgate, and Brent Alloway. This project involves analyzing trace elements in glass shards from  
 1088 four carefully selected tephra-derived glass samples (A-D) using a range of analytical techniques  
 1089 including LA-ICP-MS, ion probe, isotopic analyses, mini-bulk methods, etc. More than 30 analytical labs  
 1090 are involved in the project.

1091

1092 Within project (1), the further development of regional, thence global, databases is a priority because  
 1093 incomplete data are tending to limit correlation efficacy, especially as ‘exotic’ cryptotephtras are now being  
 1094 increasingly discovered many thousands of kilometres away from source as ultra-distal deposits (e.g., Lane et  
 1095 al., 2017a; Lowe et al., 2017a; van der Bilt et al., 2017; Abbott et al., 2020a; Krüger and van den Bogaard,  
 1096 2021; Jensen et al., in press). The growing need for developing modern tephra databases was emphasised in  
 1097 discussions on JISCMail in 2006, including contemporary comments from Chris Turney and Simon Blockley,  
 1098 although ‘TephraBase’, first made available in June, 1995, represents one of the earliest scientific databases to  
 1099 be made available on the web (Newton et al., 1997, 2007) (see <https://www.tephrabase.org/>). Some further  
 1100 examples of databases of various types include those of Preece et al. (2011), Riede et al. (2011), Bronk  
 1101 Ramsey et al. (2015b), Gudmundsdóttir et al. (2016), Cameron et al. (2019), Meara et al. (2020), Portnyagin et  
 1102 al. (2020), and Hopkins et al. (2021b). Connecting such databases to larger, more comprehensive setups is  
 1103 exemplified in New Zealand by the availability of analytical and other data in Hopkins et al. (2021b): data are  
 1104 provided as Excel files in open access supplementary materials, in GNS Science’s (national database) Pet Lab  
 1105 (<https://pet.gns.cri.nz>), and as a file submission on EarthChem (<https://doi.org/10.26022/IEDA/111724>)  
 1106 (Hopkins et al., 202b).

1107 The ‘best practices’ group has taken things even further towards a global or ‘next generation’ system  
 1108 using both SESAR ([www.geosamples.org](http://www.geosamples.org)) to generate unique, persistent global digital indices (IGSNs) for  
 1109 tephra samples, and EarthChem (<https://earthchem.org/>) on the tephra portal (noted above). SESAR provides  
 1110 access to IGSNs for samples, specimens, and related sampling features from the natural environment



1111 (<https://www.igsn.org/>). Registration with IGSN allows samples to be unambiguously cited and linked to data  
 1112 and publications, and tracked through labs and repositories, making samples ‘findable, accessible,  
 1113 interoperable, and reusable’ (FAIR). SESAR develops and operates digital tools and infrastructure for  
 1114 researchers, institutions, and sample facilities to store and openly share information about their samples.  
 1115 IGSNs can register field sites and cores as well as samples. In the longer term, the vision is for everything to  
 1116 be connected. Hence, someone in the near future could undertake a geochemical search and, from there, find  
 1117 all related data and information from the labs for potentially correlative samples, all of the related  
 1118 publications, the researchers who did the work, and everything including the original field sites (Steve Kuehn  
 1119 personal communication, 2021).

1120 Another recent development from the volcanological community is the comprehensive VOLCORE  
 1121 (Volcanic Core Records) database (Mahony et al., 2020). Although not strictly a COT initiative, it is  
 1122 nonetheless a very important advance for tephrochronologists and volcanologists alike, hence is documented  
 1123 here. VOLCORE comprises a collection of 34,696 visible tephra (volcanic ash and lithological or grain size  
 1124 variations) occurrences reported in the initial reports volumes of all of the Deep Sea Drilling Project (DSDP;  
 1125 1966–1983), the Ocean Drilling Program (ODP; 1983–2003), the Integrated Ocean Drilling Program (IODP;  
 1126 2003–2013), and the International Ocean Discovery Program (IODP; 2013–present) up to and including IODP  
 1127 Expedition 381. Data include the depth below sea floor, tephra thickness, location, and any reported  
 1128 comments. The authors report that an approximate age was estimated for most (29,493) of the tephra layers  
 1129 using published age-depth models, and that VOLCORE can be used as a starting point for studies of  
 1130 tephrochronology, volcanology, geochemistry, studies of sediment transport, and palaeoclimatology (Mahony  
 1131 et al., 2020). 

## 1133 8 Conclusions

1135 Although modern tephra studies effectively began globally in the late 1920s, and the terms ‘tephra’ and  
 1136 ‘tephrochronology’ were resurrected and coined, respectively, by Thórarinnsson in 1944, the advent of a  
 1137 portmanteau group catering for tephrochronologists globally did not exist until 7 September, 1961. On that  
 1138 day, the Commission on Tephrochronology was born within INQUA, thanks largely to the very substantial  
 1139 efforts of Kunio Kobayashi, along with those of Masao Minato and Sohei Kaizuka, backed by the National  
 1140 Committee of Quaternary Research of Japan, and various supporters including Thórarinnsson and others. In this  
 1141 article we have traced COT’s development, including both waxing and waning phases, for the past 60 years in  
 1142 what is the first review of the commission and its activities, our aim being to preserve, document, and  
 1143 comment on important historical information and events. In preparing the review, we felt a substantial  
 1144 obligation to inform succeeding generations because many of the commission members, especially ECRs,  
 1145 have shown a strong commitment for COT’s continuation as a vigorous stand-alone international research  
 1146 group.





1147 A critical turning point in COT's fortunes is identified as taking place in 1987, after which the  
1148 commission began to flourish. The 'Active Tephra' meeting in southern Japan in 2010 was another key point  
1149 in COT's development, as new dating methods and analytical techniques were being developed, or had been  
1150 achieved, and many of the ECRs (including students) from around that time started to become – or had  
1151 become – leaders in the discipline. Now with strong numbers of members globally and expertise  
1152 encompassing a much wider range of countries than previously, and a high proportion of ECRs working  
1153 alongside a mix of experienced mid-career and senior practitioners, the commission might be seen as attaining  
1154 close to its full potential in the past decade, most notably in the three meetings held since 2017. Support and  
1155 enthusiasm for the discipline of tephrochronology has never been stronger. Renewed linkages with the  
1156 volcanological community – unequivocal now that IAVCEI is the commission's sponsor – alongside the  
1157 Quaternary paleoenvironmental, archaeological, and geochronological communities, are also important.

1158 We have documented and illustrated the nine inter-INQUA specialist tephra field meetings, each  
1159 averaging nearly 60 participants, which have taken place in seven different countries, along with other  
1160 activities including key involvement of tephrochronologists in projects such as INTIMATE, RESET, or  
1161 SMART, the organisation of tephra sessions or symposia at full congresses of INQUA, or in conjunction with  
1162 various commissions (e.g., Loess, Palaeoclimate, Paleopedology), and specialist workshops facilitated and/or  
1163 run by COT. We have also listed the commission's outputs of highly-cited special journal issues or books or  
1164 specialist websites. The commission has been led by 29 officers in total, representing nine countries, and  
1165 many have served eight years or more on COT. Fifteen recipients representing eight countries have been  
1166 awarded honorary life membership.

1167 It is perhaps ironical that at recent meetings a majority (or close to it) of participants has comprised  
1168 those studying cryptototephra in countries without active, or even recently active, volcanism. Nevertheless,  
1169 the continuing rise and impact of research by members of COT, both in volcanic and non-volcanic countries,  
1170 including increasing proportions of ECRs and female tephrochronologists, ensure an exciting, enlightened,  
1171 and, perhaps equally importantly, collegial and warm-hearted future for all tephrochronologists in advancing  
1172 the discipline.

1173

1174 **Author contributions.** DJL and PMA wrote the initial draft with support from TS and BJLJ who contributed  
1175 valuable information and editing. All authors contributed to the final paper.

1176

1177 **Competing interests.** The authors declare that there is no conflict of interest.

1178

1179 **Acknowledgments.** We are very grateful to John Westgate, Steve Kuehn, Hiroshi Machida, Colin Wilson,  
1180 Marcus Bursik, Jean-Paul Raynal, Paul van den Bogaard, John Hunt, Steve Self, Sir Stephen (Steve) Sparks,  
1181 Vince Neall, Nick Pearce, Ray Cas, Hans-Ulrich Schmincke, Bruce Houghton, Mizuo Machida, Etienne  
1182 Juvigné, and Maria McGuire for their help in this compilation. We acknowledge and thank all those who have



1183 helped with COT and its development and activities and associated scientific advances over the past 60 years,  
1184 and for the wonderful attendant companionship enjoyed by participants in the commission's activities. The  
1185 paper is an output of COT of the International Association of Volcanism and Chemistry of the Earth's  
1186 Interior (IAVCEI).

1187

1188

## 1189 **References**

1190

1191 Abbott, P.M., Griggs, A.J., Bourne, A.J., and Davies, S.M.: Tracing marine cryptotephra in the North Atlantic  
1192 during the last glacial period: protocols for identification, characterisation and evaluating depositional  
1193 controls. *Marine Geology* 401, 81–97, 2018a.

1194 Abbott, P.M., Griggs, A.J., Bourne, A., Chapman, M.R., and Davies, S.: Tracing marine cryptotephra in the  
1195 North Atlantic during the last glacial period: improving the North Atlantic marine tephra framework.  
1196 *Quaternary Science Reviews* 189, 169–186, 2018b

1197 Abbott, P.M., Jensen, B.J.L., Lowe, D.J., Suzuki, T., and Veres, D.: Crossing new frontiers: extending  
1198 tephrochronology as a global geoscientific research tool. *Journal of Quaternary Science* 35 (1-2), 1–8,  
1199 2020a.

1200 Abbott, P.M., Jensen, B.J.L., Lowe, D.J., Suzuki, T., and Veres, D. (editors): Tephrochronology as a global  
1201 geoscientific research tool. *Journal of Quaternary Science* 35 (1/2), 1–379, 2020b.

1202 Abbott, P., Bonadonna, C., Bursik, M., Cashman, K., Davies, S., Jensen, B., Kuehn, S., Kurbatov, A., Lane,  
1203 C., Plunkett, G., Smith, V., Thomlinson, E., Thordarsson, T., Walker, J.D., and Wallace, K.: Best practice  
1204 templates for tephra collection, analysis, and correlation (Version 3.0.0) [Data set].  
1205 Zenodo, <http://doi.org/10.5281/zenodo.3866266>, 2021.

1206 Albert, P.G., Smith, V.C., Suzuki, T., McLean, D., Tomlinson, E.L., Miyabuchi, Y., Kitaba, I., Mark, D.F.,  
1207 Moriawaki, H., SG06 Project Members, and Nakagawa, T.: Geochemical characterisation of the Late  
1208 Quaternary widespread Japanese tephrostratigraphic markers and correlations to the Lake Suigetsu  
1209 sedimentary archive (SG06 core). *Quaternary Geochronology* 52, 103–131, 2019.

1210 Alloway, B.V., Lowe, D.J., Barrell, D.J.A., Newnham, R.M., Almond, P.C., Augustinus, P.C., Bertler, N.A.,  
1211 Carter, L., Litchfield, N.J., McGlone, M.S., Shulmeister, J., Vandergoes, M.J., Williams, P.W., and NZ-  
1212 INTIMATE members.: Towards a climate event stratigraphy for New Zealand over the past 30,000 years  
1213 (NZ-INTIMATE project). *Journal of Quaternary Science* 22, 9–35, 2007.

1214 Alloway, B.V., Froese, D.G., and Westgate, J.A.: Proceedings of the International Field Conference and  
1215 Workshop of Tephrochronology and Volcanism: Dawson City, Yukon Territory, Canada (31 July–8  
1216 August 2005). Institute of Geological and Nuclear Sciences Science Report 2005/22. 69 pp, 2005.

1217 Alloway, B.V., Lowe, D.J., Larsen, G., Shane, P.A.R., and Westgate, J.A.: Tephrochronology, in The  
1218 Encyclopaedia of Quaternary Science, 2nd edition, edited by Elias, S.A., Mock, C.J., Elsevier, Amsterdam,  
1219 4, 277–304, 2013.

1220 Ashworth, A. 2018. INQUA president's report. *Quaternary Perspectives* 25 (1), 1–2.



- 1221 Auer, V.: The Pleistocene of Fuego-Patagonia. Part IV: bog profiles. *Annales Academiae Scientiarum*  
1222 *Fennicae, Series A, III. Geological-Geographica* 80, 1–160, 1965.
- 1223 Austin, W.E.N., Abbott, P.M., Davies, S.M., Pearce, N.J.G., and Wastegård, S. (editors): Marine  
1224 tephrochronology: an introduction to tracing time in the ocean. Geological Society, London, Special  
1225 Publications 398, 1–6, 2014a.
- 1226 Austin, W.E.N., Abbott, P.M., Davies, S.M., Pearce, N.J.G., and Wastegård, S. (editors): Marine  
1227 tephrochronology. Geological Society, London, Special Publications 398, 1–213, 2014b.
- 1228 Barrell, D.J.A., Almond, P.C., Vandergoes, M.J., Lowe, D.J., Newnham, R.M., and NZ-INTIMATE  
1229 members.: A composite pollen-based stratotype for inter-regional evaluation of climatic events in New  
1230 Zealand over the past 30,000 years (NZ-INTIMATE project). *Quaternary Science Reviews* 74, 4–20, 2013.
- 1231 Begét, J.E., Stihler, S.D., and Stone, D.B. 1994. A 500-year-long record of tephra falls from Redoubt Volcano  
1232 and other volcanoes in upper Cook Inlet, Alaska. *Journal of Volcanology and Geothermal Research* 62,  
1233 55–67, 1994.
- 1234 Begét, J.E., Machida, H., and Lowe, D.J. (editors): Climatic impact of explosive eruptions – recommendations  
1235 for research. *PAGES Workshop Report Series* 96-3, 1–28, 1996.
- 1236 Benediktsson, I.O., Björnsson, H., Larsen, G., and Sigmarsson, O.: Glaciology and volcanology on the  
1237 centenary of Sigurður Þórarinnsson's birth: a special issue. *Jökull* 62, 1–2, 2012a.
- 1238 Benediktsson, I.O., Björnsson, H., Larsen, G., and Sigmarsson, O. (editors): Glaciology and volcanology on  
1239 the centenary of Sigurður Þórarinnsson's birth: a special issue. *Jökull* 62, 1–184, 2012b.
- 1240 Björnsson, H.: Obituary: Sigurdur Thórarinnsson—1912–1983. *Journal of Glaciology* 29, 521–523, 1983.
- 1241 Blaauw, M.: PaleoChronology building workshop. *PAGES News* 19 (1), 34, 2011.
- 1242 Blaauw, M., Christen, J.A., Bennett, K.D., and Reimer, P.J.: Double the dates and go for Bayes – impacts of  
1243 model choice, dating density and quality on chronologies. *Quaternary Science Reviews* 188, 58–66, 2018.
- 1244 Blockley, S.P.E., Blauuw, M., Bronk Ramsey, C., and van der Plicht, J.: Building and testing age models for  
1245 radiocarbon dates in Lateglacial and Early Holocene sediments. *Quaternary Science Reviews* 26,  
1246 1915–1926, 2007.
- 1247 Blockley, S.P.E., Bourne, A.J., Brauer, A., Davies, S.M., Harding, P.R., Lane, C.S., MacLeod, A., Matthews,  
1248 I.P., Pyne-O'Donnell, S.D.F., Rasmussen, S.O., Wulf, S., and Zanchetta, G.: Tephrochronology and the  
1249 extended intimate (integration of ice-core, marine and terrestrial records) event stratigraphy (8–128 ka  
1250 b2k). *Quaternary Science Reviews* 106, 88–100, 2014.
- 1251 Blong, R., Enright, N., and Grasso, P.: Preservation of thin tephra. *Journal of Applied Volcanology* 6, 10,  
1252 2017.
- 1253 Bolton, M.S.M., Jensen, B.J.L., Wallace, K., Praet, N., Fortin, D., Kaufman, D., and de Batist, M.: Machine  
1254 learning classifiers for attributing tephra to source volcanoes: an evaluation of methods for Alaska tephtras.  
1255 *Journal of Quaternary Science* 35, 81–92, 2020.



- 1256 Bronk Ramsey, C., Albert, P.G., Blockley, S.P.E., Hardiman, M., Housley, R.A., Lane, C.S., Lee, S.,  
1257 Matthews, I.P., Smith, V.C., and Lowe, J.J.: Improved age estimates for key Late Quaternary European  
1258 tephra horizons in the RESET lattice. *Quaternary Science Reviews* 118, 18–32, 2015a.
- 1259 Bronk Ramsey, C., Housley, R.A., Lane, C.S., Smith, V.C., and Pollard, A.M.: The RESET tephra database  
1260 and associated analytical tools. *Quaternary Science Reviews* 118, 33–47, 2015b.
- 1261 Bunting, M.J., Blackford, J., Gehrels, M.J., and Gehrels, W.R.: In memoriam and dedication: Richard John  
1262 Payne (1978-2019). *Journal of Quaternary Science* 35, 9–10, 2020.
- 1263 Bursik, M., Kuehn, S.C., Wallace, K.L., and Kurbatov, A.V.: “Tephra 2017 Workshop: best practices in  
1264 tephra collection, analysis, and reporting leading toward better tephra databases”,  
1265 <https://vhub.org/resources/4166>, 2017.
- 1266 Cameron, C.E., Mulliken, K.M., Crass, S.W., Schaefer, J.R., and Wallace, K.L.: Alaska Volcano Observatory  
1267 geochemical database, version 2. Alaska Division of Geological and Geophysical Surveys Digital Data  
1268 Series 8 v. 2, 22 pp., <https://www.avo.alaska.edu/geochem/> or <http://doi.org/10.14509/30058>, 2019.
- 1269 Cas, R.A.F.: IAVCEI: from small beginnings to a vibrant international association. *History of Geo- and Space*  
1270 *Sciences* 10, 181–191, 2019.
- 1271 Cashman, K.V. and Rust, A.C.: Far-travelled ash in past and future eruptions: combining tephrochronology  
1272 with volcanic studies. *Journal of Quaternary Science* 35, 11–22, 2020.
- 1273 Catto, N.: Retrospective thoughts. *Quaternary International* 500, 5–6, 2019.
- 1274 Cole, J.W., Kohn, B.P., Pullar, W.A., Milne, J.D.G., Vucetich, C.G., and Healy, J.: Pyroclastic nomenclature  
1275 in New Zealand. *New Zealand Journal of Geology and Geophysics* 15, 686–692, 1972.
- 1276 Committee for Publishing of Selected Papers by Professor Kunio Kobayashi.: Selected papers of Professor  
1277 Kunio Kobayashi, Saitama, 673 pp., 1990 (in Japanese).
- 1278 Crandell, D.R. and Mullineaux, D.R.: Potential hazards from future eruptions of Mount St. Helens volcano,  
1279 Washington. *U.S. Geological Survey Bulletin* 1383-C, 1–26, 1978.
- 1280 Cutler, N.A., Shears, O.M., Streeter, R.T., and Dugmore, A.J.: Impact of small-scale vegetation structure on  
1281 tephra layer preservation. *Scientific Reports* 6, 37260, 2016.
- 1282 Danišík, M., Schmitt, A.K., Stockli, D.F., Lovera, O.M., Dunkl, I., and Evans, N.J.: Application of combined  
1283 U-Th-disequilibrium/U-Pb and (U-Th)/He zircon dating to tephrochronology. *Quaternary Geochronology*  
1284 40, 23–32, 2017.
- 1285 Danišík, M., Lowe, D.J., Schmitt, A.K., Friedrichs, B., Hogg, A.G., and Evans, N.J.: Sub-millennial eruptive  
1286 recurrence in the silicic Mangaone Subgroup tephra sequence, New Zealand, from Bayesian modelling of  
1287 zircon double-dating and radiocarbon ages. *Quaternary Science Reviews* 246, 106517, 2020.
- 1288 Davies, S.M.: Cryptotephra: the revolution in correlation and precision dating. *Journal of Quaternary Science*  
1289 30, 114–130, 2015.
- 1290 Davies, S.M. and Alloway, B.V.: Yukon ho! International Field Conference and Workshop on  
1291 Tephrochronology and Volcanism. *Quaternary Australasia* 23(2), 16–18, 2006.



- 1292 Davies S.M., Branch N.P., Lowe J.J., and Turney C.S.M.: Towards a European tephrochronological  
1293 framework for Termination 1 and the Early Holocene. *Philosophical Transactions of the Royal Society*,  
1294 London, Series A 360, 767–802, 2002.
- 1295 Davies, S.M., Mortensen, A.K., Baillie, M.G.L., Clausen, H.B., Grönvold, K., Hall, V.A., Johnsen, S.J.,  
1296 Pilcher, J.R., Steffensen, J.P., and Wastegård, S.: Tracing volcanic events in the Greenland ice cores. *Past*  
1297 *Global Changes (PAGES)* 13(3), 10–11, 2004.
- 1298 Davies, S.M., Larsen, G., Wastegård, S., Turney, C.S.M., Hall, V.A., Coyle, L., and Thordarson, T.:  
1299 Widespread dispersal of Icelandic tephra: how does the Eyjafjöll eruption of 2010 compare to past  
1300 Icelandic events? *Journal of Quaternary Science* 25, 605–611, 2010.
- 1301 Davies, S.M., Abbott, P.M., Pearce, N.J.G., Wastegård, S., and Blockley, S.P.E.: Integrating the INTIMATE  
1302 records using tephrochronology: rising to the challenge. *Quaternary Science Reviews* 36, 11–27, 2012.
- 1303 Davies, S.M., Abbott, P.M., Meara, R.H., Pearce, N., Austin, W., Chapman, M., Svensson, A., Bigler, M.,  
1304 Rasmussen, T., Rasmussen, S., and Farmer, E.: A North Atlantic tephrostratigraphical framework for 130–  
1305 60 ka b2k: new tephra discoveries, marine-based correlations, and future challenges. *Quaternary Science*  
1306 *Reviews* 106, 101–121, 2014.
- 1307 Dugmore, A.J.: Icelandic volcanic ash in Scotland. *Scottish Geographical Magazine* 105, 168–172, 1989.
- 1308 Dugmore, A.J. and Newton, A.J.: Isochrons and beyond: maximising the use of tephrochronology in  
1309 geomorphology. *Jökull* 62, 39–52, 2012.
- 1310 Dugmore, A.J., Newton, A.J., Edwards, K.J., Larsen, G., Blackford, J.J., and Cook, G.T.: Long-distance  
1311 marker horizons from small-scale eruptions: British tephra deposits from the AD 1510 eruption of Hekla,  
1312 Iceland. *Journal of Quaternary Science* 11, 511–516, 1996.
- 1313 Dugmore, A.J., Larsen, G., Newton, A.J.: Tephrochronology and its application to Late Quaternary  
1314 environmental reconstruction, with special reference to the North Atlantic islands, in *Tools for*  
1315 *Constructing Chronologies – Crossing Discipline Boundaries*, edited by Buck, C.E. and Millard, A.R.,  
1316 *Lecture Notes In Statistics*, Springer, 173–188, 2004.
- 1317 Dugmore, A.J., Newton, A.J., and Smith, K.T.: Workshop on the Eyjafjallajökull eruptions of 2010 and  
1318 implications for tephrochronology, volcanology and Quaternary studies. *Tephra in Quaternary Science*  
1319 *(TIQS). Edinburgh Workshop Report and Community Statement*. 15 pp,  
1320 [https://www.tephrabase.org/tiqs2011/tiqs2011\\_report.pdf](https://www.tephrabase.org/tiqs2011/tiqs2011_report.pdf), 2011.
- 1321 Dugmore, A.J., Thompson, P.I., Streeter, R.T., Cutler, N.A., Newton, A.J., and Kirkbride, M.P.: The  
1322 interpretative value of transformed tephra sequences. *Journal of Quaternary Science* 35, 23–38, 2020.
- 1323 Eden D.N. and Furkert, R.J. (editors): *Loess: its Distribution, Geology and Soils*. Balkema, Rotterdam, 245  
1324 pp., 1988.
- 1325 Elston, W., Heiken, G.: IAVCEI Working Group on Explosive Volcanism. *EOS* 65 (26), 411, 1984.
- 1326 Fairbridge, R.W.: INQUA in New Zealand. *Geology* 2, 505–506, 1974.





- 1327 Freundt, A., Schindlbeck-Belo, J.C., Kutterolf, S., and Hopkins, J.L.: Tephra layers in the marine  
1328 environment: a review of properties and emplacement processes. Geological Society, London, Special  
1329 Publications (in press), DOI: <https://doi.org/10.1144/SP520-2021-50>, 2021.
- 1330 Froese, D.G., Westgate, J.A., and Alloway, B.V. (editors): Field Trip Guide for the International Field  
1331 Conference and Workshop of Tephrochronology and Volcanism: Dawson City, Yukon Territory, Canada  
1332 (31 July–8 August 2005). Institute of Geological and Nuclear Sciences Science Report 2005/26. 132 pp,  
1333 2005.
- 1334 Froese, D.G., Lowe, D.J., Knott, J.R., and Slate, J.L.: Preface – Global tephra studies: John Westgate and  
1335 Andrei Sarna-Wojcicki commemorative volume. Quaternary International 178, 1–3, 2008a.
- 1336 Froese, D.G. Lowe, D.J., Knott, J., and Slate, J.L. 2008b. John A. Westgate — global tephrochronologist,  
1337 stratigrapher, mentor. Quaternary International 178, 4–9, 2008b.
- 1338 Froese, D.G., Slate, J., Lowe, D.J., and Knott, J.R. (editors): Global tephra studies: John Westgate and Andrei  
1339 Sarna-Wojcicki commemorative volume. Quaternary International 178, 1–319, 2008c.
- 1340 Froggatt, P.C.: Standardization of the chemical analysis of tephra deposits. Report of the ICCT working  
1341 group. Quaternary International 13-14, 93–96, 1992.
- 1342 Froggatt, P.C. and Lowe, D.J.: A review of late Quaternary silicic and some other tephra formations from  
1343 New Zealand: their stratigraphy, nomenclature, distribution, volume, and age. New Zealand Journal of  
1344 Geology and Geophysics 33, 89–109, 1990.
- 1345 Gehrels, M.J., Newnham, R.M., Lowe, D.J., Wynne, S., Hazell, Z.J., and Caseldine, C.: Towards rapid assay  
1346 of cryptotephra in peat cores: review and evaluation of various methods. Quaternary International 178,  
1347 68–84, 2008.
- 1348 Gudmundsdóttir, E.R., Larsen, G., Björck, S., Ingólfsson, O., Striberger, J.: A new high-resolution Holocene  
1349 tephra stratigraphy in eastern Iceland: improving the Icelandic and North Atlantic tephrochronology.  
1350 Quaternary Science Reviews 150, 234–249, 2016.
- 1351 Gudmundsson, M.T., Pedersen, R., Vogfjörð, K., Thorbjarnardóttir, Jakobsdóttir, S., Roberts, M.J.: Eruptions  
1352 of Eyjafjallajökull Volcano, Iceland. EOS 91 (21), 190–191, 2010.
- 1353 Haflidason, H., Eiríksson, J., and van Kreveld, S.: The tephrochronology of Iceland and the North Atlantic  
1354 region during the Middle and Late Quaternary: a review. Journal of Quaternary Science 15, 3–22, 2000.
- 1355 Hall, V.A. and Alloway, B.V. (editors): Tephra. Past Global Changes (PAGES) 13(3), 5–17, 2004.
- 1356 Hall, V.A. and Pilcher, J.R.: Late-Quaternary Icelandic tephra in Ireland and Great Britain: detection,  
1357 characterization and usefulness. The Holocene 12, 223–230, 2002.
- 1358 Hayward, C.: High spatial resolution electron probe microanalysis of tephra and melt inclusions without  
1359 beam-induced chemical modification. The Holocene 22, 119–125, 2012.
- 1360 Heiken, G. and Wohletz, K.: Tephra deposits associated with silicic domes and lava flows. Geological Society  
1361 of America Special Papers 212, 55–76, 1987.



- 1362 Hopkins, J.L., Bidmead, J.E., Lowe, D.J., Wysoczanski, R.J., Pillans, B.J., Ashworth, L., Rees, A.B., and  
1363 Tuckett, F.: TephraNZ, Version 1.0, Interdisciplinary Earth Data Alliance (IEDA) [code],  
1364 <https://doi.org/10.26022/IEDA/111724>, 2020.
- 1365 Hopkins, J.L., Lowe, D.J., and Horrocks, J.H.: Tephrochronology in Aotearoa New Zealand. New Zealand  
1366 Journal of Geology and Geophysics 64 (2/3), 153–200, 2021a.
- 1367 Hopkins, J.L., Bidmead, J.E., Lowe, D.J., Wysoczanski, R.J., Pillans, B.J., Ashworth, L., Rees, A.B.H., and  
1368 Tuckett, F.: TephraNZ: a major- and trace-element reference dataset for glass-shard analyses from  
1369 prominent Quaternary rhyolitic tephra in New Zealand and implications for correlation. Geochronology 3,  
1370 465–504, (<https://doi.org/10.5194/gchron-3-465-2021>), 2021b.
- 1371 Holt, K.A. and Lowe, D.J.: Active tephra in Kyushu 2010: international field conference. Quaternary  
1372 Australasia 27 (2), 7–10, 2010.
- 1373 Houghton, B.F. and Wilson, C.J.N.: Explosive rhyolitic volcanism: the case studies of Mayor Island and  
1374 Taupo volcanoes. New Zealand Geological Survey Record 12, 33–100, 1986.
- 1375 Howorth, R. New formations of late Pleistocene tephra from the Okataina Volcanic Centre, New Zealand.  
1376 New Zealand Journal of Geology and Geophysics 18, 683–712, 1975.
- 1377 Howorth, R., Froggatt, P.C., Vucetich, C.G., and Collen, J.D. (editors): Proceedings of Tephra Workshop, 30  
1378 June–1 July, 1980, Victoria University of Wellington. Geology Department, Victoria University of  
1379 Wellington Publication 20, 1–100, 1981.
- 1380 Hunt, J.B.: Foreword [to ‘Distal tephrochronology, tephrology and volcano-related atmospheric effects’].  
1381 Global and Planetary Change 21, vii–viii, 1999a.
- 1382 Hunt, J.B. (editor): Distal tephrochronology, tephrology and volcano-related atmospheric effects. Global and  
1383 Planetary Change 21, 1–196, 1999b.
- 1384 Hunt, J.B.: Peter Graham Hill (1942–2010) – inspirational tephra analyst and mentor. Quaternary  
1385 International 246, 17–18, 2011.
- 1386 Hunt, J.B. and Hill, P.G.: Tephra geochemistry: a discussion of some persistent analytical problems. The  
1387 Holocene 3, 271–278, 1993.
- 1388 Hunt, J.B. and Hill, P.G.: An inter-laboratory comparison of the electron probe microanalysis of glass  
1389 geochemistry. Quaternary International 34–36, 229–241, 1996.
- 1390 Hunt, J.B. and Hill, P.G.: Tephrological implications of beam size – sample-size effects in electron  
1391 microprobe analysis of glass shards. Journal of Quaternary Science 16, 105–117, 2001.
- 1392 Hunt, J.B., Clift, P.D., Lacasse, C., Vallier, T.L., Werner, R.: Interlaboratory comparison of electron probe  
1393 microanalysis of glass geochemistry, in: Proceedings of the Ocean Drilling Program, Scientific Results,  
1394 edited by Saunders, A.D., Larsen, H.C., and Wise, S.W. Jr., 152, 85–91, 1998.
- 1395 Jensen, B.J.L., Pyne-O'Donnell, S., Plunkett, G., Froese, D.G., Hughes, P.D.M., Sigl, M., McConnell, J.R.,  
1396 Amesbury, M.J., Blackwell, P.G., van den Bogaard, C., Buck, C.E., Charman, D.J., Clague, J.J., Hall,



- 1397 V.A., Koch, J., Mackay, H., Mallon, G., McColl, L., and Pilcher, J.R.: Transatlantic distribution of the  
1398 Alaskan White River ash. *Geology* 42, 875–878, 2014.
- 1399 Jensen, B.J.L., Davies, L., Nolan, C., Pyne-O'Donnell, S., Monteath, A.J., Ponomareva, V., Portnyagin, M.,  
1400 Booth, R., Bursik, M., Cook, E., and Plunkett, G.: A latest Pleistocene and Holocene composite  
1401 tephrostratigraphic framework for northeastern North America. *Quaternary Science Reviews*, in press.
- 1402 Juvigné, E.T. and Raynal, J.-P.: Avant-propos [to 'Tephros – chronology, archaeology']. *Les Dossiers de*  
1403 *l'Archéo-Logis* 1, 7–8, 2001a.
- 1404 Juvigné, E.T. and Raynal, J.-P. (editors): *Tephros – chronology, archaeology*. *Les Dossiers de l'Archéo-*  
1405 *Logis* 1, 1–262, 2001b.
- 1406 Juvigné, E., Lenoble-Pinson, M., and Raynal, J.-P.: *Tephra nomenclatura en langue française*. *Les Dossiers de*  
1407 *l'Archeo-Logis* 1, 11–15, 2001.
- 1408 Karátson, D., Veres, D., Lowe, D.J.: INTAV tephra conference “Crossing New Frontiers: Tephra Hunt in  
1409 Transylvania”, 24 June–1 July, 2018, Moieciu de Sus, Romania. *IAVCEI News* 4/2018, 9–11, 2018.
- 1410 Kaizuka, S. (compiler): Reports of the IX Congress of the International Union for Quaternary Research [in  
1411 Christchurch]. *The Quaternary Research (Daiyonki-Kenkyu)* 13, 71–90.
- 1412 Kile, D.E.: Memorial of Ray E. Wilcox, 1912–2012. *American Mineralogist* 98, 1372–1374, 2013.
- 1413 Kinder, M., Wulf, S., and Appelt, O.: Detection of the historical Askja AD 1875 and modern Icelandic  
1414 cryptotephros in varved lake sediments – results from a first systematic search in northern Poland. *Journal*  
1415 *of Quaternary Science* 36, 1–7, 2021.
- 1416 Kobayashi, K.: Report from the VIth Congress of INQUA (Warszawa). *The Quaternary Research (Daiyonki-*  
1417 *Kenkyu)* 2, 125–132, 1962.
- 1418 Kobayashi, K.: Report from the conference on tephrochronology held at the VI<sup>th</sup> International Congress of  
1419 INQUA. Report on the VI<sup>th</sup> International Congress on Quaternary, Warsaw (1961) 1, 781–789, 1965.
- 1420 Kobayashi, K.: Methods of identification of particular tephra layers. *Études sur le Quaternaire dans le Monde*,  
1421 VIIIth INQUA Congrès Paris, compiled by Ters, M., Centre National de la Recherche Scientifique 2,  
1422 981–984, 1969.
- 1423 Kobayashi, K.: Some basic problems in tephrochronology. *The Quaternary Research (Daiyonki-Kenkyu)* 11,  
1424 211–218, 1972.
- 1425 Kobayashi, K. and Shimizu, H.: Pleistocene tephros in the northern part of Ina Valley, central Japan. *Journal*  
1426 *of the Faculty of Liberal Arts and Science, Shinshu University* 12, 20–52, 1962.
- 1427 Krüger, S. and van den Bogaard, C.V.: Small shards and long distances – three cryptotephra layers from the  
1428 Nahe palaeolake including the first discovery of Laacher See Tephra in Schleswig–Holstein (Germany).  
1429 *Journal of Quaternary Science* 36, 8–19, 2021.
- 1430 Kuehn, S.C.: Concord EPMA\_Oxides\_METHOD\_FeTi-Ox1.0, Version 1.0. Interdisciplinary Earth Data  
1431 Alliance (IEDA), <https://doi.org/10.26022/IEDA/112110>, 2021a.



- 1432 Kuehn, S.C.: Concord EPMA\_Glass\_METHOD\_6.0, Version 1.0. Interdisciplinary Earth Data Alliance
- 1433 (IEDA), <https://doi.org/10.26022/IEDA/112102>, 2021b.
- 1434 Kuehn, S.C. and Hostetler, A.: Summer Lake Pliocene Tephra Dataset [Version 1.0].
- 1435 Zenodo, <https://doi.org/10.5281/zenodo.4072461>, 2020.
- 1436 Kuehn, S.C. and Lyon, E.: June Lake Tephra Dataset [Version 1.0]. Zenodo,
- 1437 <https://doi.org/10.5281/zenodo.4074290>, 2020.
- 1438 Kuehn, S.C., Froese, D.G., Shane, P.A.R., and INTAV intercomparison participants: The INTAV
- 1439 intercomparison of electron-beam microanalysis of glass by tephrochronology laboratories: results and
- 1440 recommendations. *Quaternary International* 246, 19–47, 2011.
- 1441 Kuehn, S.C., Pouget, S., Wallace, K., and Bursik, M.I.: Results of the tephra 2014 workshop on maximizing
- 1442 the potential of tephra for multidisciplinary science, in: AGU Fall Meeting Abstracts, 1, 4758.
- 1443 <http://dx.doi.org/10.13140/RG.2.1.2454.0002> abstract #V31C-4758, 2014.
- 1444 Kuehn, S.C., Bursik, M.I., Goring, S.J., Kodama, S., Kurbatov, A., Lehnert, K., Profeta, L., Quinn, D.,
- 1445 Ramdeen, S., Wallace, K., and Walker, J.D.: Making tephra data FAIR and connected through community-
- 1446 driven best practices for digital data collection and documentation. EarthCube Annual Meeting, June 15-
- 1447 17, <http://dx.doi.org/10.13140/RG.2.2.28695.50083> <https://doi.org/10.6084/m9.figshare.14773083.v1>,
- 1448 2021.
- 1449 Lane, C.S. and Woodward, C.: Tephrochronology, in: *Encyclopaedia of Geoarchaeology*, 2nd edition, edited
- 1450 by Gilbert, A.S., Springer, Dordrecht, 1–9, [https://doi.org/10.1007/978-1-4020-4409-0\\_185](https://doi.org/10.1007/978-1-4020-4409-0_185), 2022.
- 1451 Lane, C.S., Cullen, V.L., White, D., Bramham-Law, C.W.F., and Smith, V.C.: Cryptotephra as a dating and
- 1452 correlation tool in archaeology. *Journal of Archaeological Science* 42, 42–50, 2014.
- 1453 Lane, C.S., Lowe, D.J., Blockley, S.P.E., Suzuki, T., and Smith, V.C.: Advancing tephrochronology as a
- 1454 global dating tool: applications in volcanology, archaeology, and palaeoclimatic research. *Quaternary*
- 1455 *Geochronology* 40, 1–7, 2017a.
- 1456 Lane, C.S., Blockley, S.P.E., Lowe, D.J., Suzuki, T., and Smith, V.C. (editors): Advancing tephrochronology
- 1457 as a global dating tool: applications in volcanology, archaeology, and palaeoclimatic research. *Quaternary*
- 1458 *Geochronology* 40, 1–145, 2017b.
- 1459 Larsen, G. and Thórarinnsson, S.: H-4 and other acid Hekla tephra layers. *Jökull* 27, 28–46, 1977.
- 1460 Larsen, G. and Eiriksson, J.: Late Quaternary terrestrial tephrochronology of Iceland – frequency of explosive
- 1461 eruptions, type and volume of tephra deposits. *Journal of Quaternary Science* 23, 109–120, 2008.
- 1462 Leicher, N., Giaccio, B., Zanchetta, G., Wagner, B., Francke, A., Palladino, D.M., Sulpizio, R., Albert, P.G.,
- 1463 and Tomlinson, E.L.: Central Mediterranean explosive volcanism and tephrochronology during the last 630
- 1464 ka based on the sediment record from Lake Ohrid. *Quaternary Science Reviews* 226, 106021, 2019.
- 1465 Linqvist, J., Fredriksson, D., and Lundqvist, T.: Minnesord (Obituary) Christer Persson. *Geologiskt Forum*
- 1466 102, 30–31, 2019.



- 1467 Lowe, D.J.: Late Quaternary volcanism in New Zealand: towards an integrated record using distal airfall  
1468 tephra in lakes and bogs. *Journal of Quaternary Science* 3, 111–120, 1988.
- 1469 Lowe, D.J.: Tephra studies in New Zealand: an historical review. *Journal of the Royal Society of New*  
1470 *Zealand* 20, 119–150, 1990a.
- 1471 Lowe, D.J.: Burning mountains, boiling rivers, and exploding soils. Report on INQUA-ICCT Field  
1472 Conference and Workshop on Tephrochronology, Mammoth Hot Springs, USA. *New Zealand Soil News*  
1473 38, 125–129, 1990b.
- 1474 Lowe, D.J. (editor): INQUA Commission on Tephrochronology COT Newsletter 2. Department of Earth  
1475 Sciences, University of Waikato, Hamilton. 13 pp, 1992.
- 1476 Lowe, D.J. (editor): INQUA Commission on Tephrochronology COT Newsletter 3. Department of Earth  
1477 Sciences, University of Waikato, Hamilton. 28 pp, 1994a.
- 1478 Lowe, D.J. (editor): Intra-conference and Post-conference Tour Guides. International Inter-INQUA Field  
1479 Conference on Tephrochronology, Loess, and Paleopedology, University of Waikato, Hamilton, New  
1480 Zealand. 186 pp, 1994b.
- 1481 Lowe, D.J.: Site-seeing in Germany. A report on the International Union for Quaternary Research (INQUA)  
1482 14th International Congress, 3-10 August 1995, Berlin, Germany. *New Zealand Soil News* 43, 253–260,  
1483 1995.
- 1484 Lowe, D.J.: The Commission on Tephra Studies: a report from the XIV International Inqua Congress, Berlin.  
1485 *Geological Society of New Zealand Newsletter* 109, 30 –33, 1996a.
- 1486 Lowe, D.J.: Preface [to ‘Tephra, loess, and paleosols – an integration’]. *Quaternary International* 34–36, 1,  
1487 1996b.
- 1488 Lowe, D.J. (editor): Tephra, loess, and paleosols – an integration. *Quaternary International* 34–36, 1–261,  
1489 1996c.
- 1490 Lowe, D.J.: Globalization of tephrochronology: new views from Australasia. *Progress in Physical Geography*  
1491 32, 311–335, 2008.
- 1492 Lowe, D.J.: Tephrochronology and its application: a review. *Quaternary Geochronology* 6, 107–153, 2011a.
- 1493 Lowe, D.J.: Active Tephra 2010: International field conference on tephrochronology. *PAGES News* 19, 33,  
1494 2011b.
- 1495 Lowe, D.J.: Final report for INTREPID Tephra-I Project (INQUA-0907). *Quaternary Perspectives* 20 (1),  
1496 8–11, 2013.
- 1497 Lowe, D.J.: Marine tephrochronology: a personal perspective. Geological Society, London, Special  
1498 Publications 398, 7–19, 2014.
- 1499 Lowe, D.J.: IFG on tephrochronology and volcanism (INTAV) project “Enhancing tephrochronology as a  
1500 global research tool through improved fingerprinting and correlation techniques and uncertainty modelling  
1501 (phase II)” (INTREPID Tephra-II: INQUA-1307s): final report. *Quaternary Perspectives* 22 (2), 12–15,  
1502 2015.





- 1503 Lowe, D.J.: News from INTAV [report on EXTRAS Project: INQUA-1710P]. *Quaternary Perspectives* 25 (1),  
1504 9–10, 2018a.
- 1505 Lowe, D.J.: Report on the INTAV international tephra conference “Crossing New Frontiers: Tephra Hunt in  
1506 Transylvania”. *Quaternary Perspectives* 25 (2), 9–11, 2018b.
- 1507 Lowe, D.J. and Alloway, B.V.: Tephrochronology, in: *Encyclopaedia of Scientific Dating Methods*, edited by  
1508 Rink, W.J. and Thompson, J.W., Springer, Dordrecht, 783–799, 2015.
- 1509 Lowe, D.J. and Hunt, J.B.: A summary of terminology used in tephra-related studies. *Les Dossiers de*  
1510 *l’Archeo-Logis* 1, 17–22, 2001.
- 1511 Lowe, D.J., Newnham, R.M., and McCraw, J.D.: Volcanism and early Maori society in New Zealand, in:  
1512 *Natural Disasters and Cultural Change*, edited by Torrence, R. and Grattan, J., Routledge, London,  
1513 126–161, 2002.
- 1514 Lowe, D.J., Tonkin, P.J., Neall, V.E., Palmer, A.S., Alloway, B.V., and Froggatt, P.C.: Colin George Vucetich  
1515 (1918–2007) – pioneering New Zealand tephrochronologist. *Quaternary International* 178, 11–15, 2008a.
- 1516 Lowe, D.J., Shane, P.A.R., Alloway, B.V., and Newnham, R.M.: Fingerprints and age models for widespread  
1517 New Zealand tephra marker beds erupted since 30,000 years ago: a framework for NZ-INTIMATE.  
1518 *Quaternary Science Reviews* 27, 95–126, 2008b.
- 1519 Lowe, J. John, Rasmussen, S.O., Björck, S., Hoek, W.Z., Steffensen, J.P., Walker, M.J.C., Yu, Z., and  
1520 INTIMATE group: Synchronisation of palaeoenvironmental events in the North Atlantic region during the  
1521 Last Termination: a revised protocol recommended by the INTIMATE group. *Quaternary Science Reviews*  
1522 27, 6–17, 2008.
- 1523 Lowe, D.J., Davies, S.M., Moriwaki, H., Pearce, N.J.G., and Suzuki, T.: Enhancing tephrochronology and its  
1524 application (INTREPID project): Hiroshi Machida commemorative volume. *Quaternary International* 246,  
1525 1–5, 2011a.
- 1526 Lowe, D.J., Moriwaki, H., Davies, S.M., Suzuki, T., and Pearce, N.J.G. (editors): Enhancing  
1527 tephrochronology and its application (INTREPID project): Hiroshi Machida commemorative volume.  
1528 *Quaternary International* 246, 1–395, 2011b.
- 1529 Lowe, D.J., Alloway, B.V., Shane, P.A.R.: Far-flown markers, in *A Continent on the Move: New Zealand*  
1530 *Geoscience Revealed*, 2nd Edition, edited by Graham, I., Geoscience Society of New Zealand (GSNZ)  
1531 with GNS Science, Wellington. GSNZ Miscellaneous Publication 141, 172–175, 2015a.
- 1532 Lowe, J. John, Bronk Ramsey, C., Housley, R.A., Lane, C.S., Tomlinson, E.L., RESET Team, and RESET  
1533 Associates: [Introduction] The RESET project: constructing a European tephra lattice for refined  
1534 synchronisation of environmental and archaeological events during the last c. 100 ka. *Quaternary Science*  
1535 *Reviews* 118, 1–17, 2015.
- 1536



- 1537 Lowe, D.J., Pearce, N.J.G., Jorgensen, M.A., Kuehn, S.C., Tryon, C.A., and Hayward, C.L.: Correlating  
1538 tephra and cryptotephra using glass compositional analyses and numerical and statistical methods:  
1539 review and evaluation. *Quaternary Science Reviews* 175, 1–44, 2017a.
- 1540 Lowe, D.J., Pearce, N.J.G., Jorgensen, M.A., Kuehn, S.C., Tryon, C.A., and Hayward, C.L.: Dedication (to  
1541 Stephen Stokes 1964–2014). *Quaternary Science Reviews* 175, 35, 2017b.
- 1542 Lowe, D.J. and members of the local organising committee and INTAV executive committee: Foreword:  
1543 Crossing New Frontiers, in: Book of Abstracts. Crossing New Frontiers: INTAV International Field  
1544 Conference on Tephrochronology, edited by Hambach, U. and Veres, D., Moieciu de Sus, Romania (24  
1545 June–1 July 2018), 1–5, 2018. [http://www.bayceer.uni-bayreuth.de/intav2018/en/key\\_](http://www.bayceer.uni-bayreuth.de/intav2018/en/key_dates/5001/1/16443/INTAV_Programm_final_vers2-2.pdf)  
1546 [dates/5001/1/16443/INTAV\\_Programm\\_final\\_vers2-2.pdf](http://www.bayceer.uni-bayreuth.de/intav2018/en/key_dates/5001/1/16443/INTAV_Programm_final_vers2-2.pdf)
- 1547 Lube, G., Breard, E.C.P., Jons, J., Fullard, L., Dufek, J., Cronin, S.J., and Wang, T.: Generation of air  
1548 lubrication within pyroclastic density currents. *Nature Geoscience* 12, 381386, 2019.
- 1549 Machida, H.: Recent progress in tephra studies in Japan. *The Quaternary Research (Daiyonki-Kenkyu)* 30,  
1550 141–149, 1991.
- 1551 Machida, H.: Volcanoes and tephra in the Japan area. *Global Environmental Research* 6, 19–28, 2002.
- 1552 Machida, H. and Arai, F., 2003. Atlas of Tephra in and Around Japan, revised edition. Tokyo: University of  
1553 Tokyo Press, 1– 336 (in Japanese), 2003.
- 1554 Machida, H. and Lowe, D.J. (editors): INQUA Commission on Tephrochronology COT Newsletter 1.  
1555 Department of Geography, Tokyo Metropolitan University, Tokyo. 7 pp, 1991.
- 1556 Meara, R.H.H., Thordarson, Th., Pearce, N.J.G., Hayward, C., Larsen, G.: A catalogue of major and trace  
1557 element data for Icelandic Holocene silicic tephra layers. *Journal of Quaternary Science* 35, 122–142,  
1558 2020.
- 1559 Mahony, S.H., Barnard, N.H., Sparks, R.S.J., and Rougier, J.C.: VOLCORE, a global database of visible  
1560 tephra layers sampled by ocean drilling. *Scientific Data* 7, 330 ([https://doi.org/10.1038/s41597-020-00673-](https://doi.org/10.1038/s41597-020-00673-1)  
1561 [1](https://doi.org/10.1038/s41597-020-00673-1)), 2020.
- 1562 Merkt, J., Müller, H., Knabe, W., Müller, P., and Weister, T.: The early Holocene Saksunarvatn tephra found  
1563 in lake sediments in NW Germany. *Boreas* 22, 93–100, 1993.
- 1564 Moar, N.T.: Contributions to the Quaternary history of the New Zealand flora. 4. Pollen diagrams from the  
1565 western Ruahine Ranges. *New Zealand Journal of Science* 4, 350–459, 1961.
- 1566 Momose, K., Kobayashi, K., Minagawa, K., and Machida, M.: Identification of tephra by means of  
1567 ferromagnetic minerals in pumice. *Bulletin of the Earthquake Research Institute* 46, 1275–1291, 1968.
- 1568 Moriwaki, H. and Lowe, D.J. (editors): Intraconference Field Trip Guides. International Field Conference on  
1569 Tephrochronology, Volcanism, and Human Activity, Kirishima City, Japan (9–17 May, 2010), INQUA  
1570 International Focus Group on Tephrochronology and Volcanism (INTAV), 1–106, 2010.
- 1571 Moriwaki, H., Suzuki, T., and Lowe, D.J.: In memoriam and dedication – Shinji Nagaoka (1958–2011).  
1572 *Quaternary International* 246, 14–16, 2011a.



- 1573 Moriwaki, H., Suzuki, T., Murata, M., Ikehara, M., Machida, H., Oba, T., and Lowe, D.J.: Sakurajima-  
1574 Satsuma (Sz-S) and Noike-Yumugi (N-Ym) tephra: new tephrochronological marker beds for the last  
1575 deglaciation, southern Kyushu, Japan. *Quaternary International* 246, 203–212, 2011b.
- 1576 Neall, V.E.: Tephrochronology and tephrostratigraphy of western Taranaki (N108-N109), New Zealand. *New*  
1577 *Zealand Journal of Geology and Geophysics* 15, 507–557, 1972.
- 1578 Neustadt, M.I.: International Union for Quaternary Research (INQUA): Historique des Congrès. INQUA,  
1579 Moscow, 97 pp., 1969 (translated from Russian by G. Krichevsky and published for the 8th INQUA  
1580 Congress in Paris as a Supplement to Bulletin de l'AFEQ).
- 1581 Newton, A.J., Gittings, B., and Stuart, N.: Designing a scientific database query server using the World Wide  
1582 Web: the example of TephraBase, in *Innovations in GIS 4*, edited by Kemp, K., Taylor & Francis, London,  
1583 251–266, 1998.
- 1584 Newton, A.J., Dugmore, A.J., and Gittings, B.M.: TephraBase: tephrochronology and the development of a  
1585 centralized European database. *Journal of Quaternary Science* 22, 737–743, 2007.
- 1586 Óladóttir, B.A., Larsen, G., and Sigmarsson, O.: Deciphering eruption history and magmatic processes from  
1587 tephra in Iceland. *Jökull* 62, 21–38, 2012.
- 1588 Oldfield, F. (editor): Past Global Changes (PAGES) Implementation Plan. IGBP Secretariat, Stockholm,  
1589 Report Series 45, 236 pp., 1998.
- 1590 Pearce, N.J.G.: Towards a protocol for the trace element analysis of glass from rhyolitic shards in tephra  
1591 deposits by laser ablation ICP-MS. *Journal of Quaternary Science*, 29, 627–640, 2014.
- 1592 Pearce, N.J.G., Westgate, J.A., Perkins, W.T., Eastwood, W.J., and Shane, P.A.R.: The application of laser  
1593 ablation ICP-MS to the analysis of volcanic glass shards from tephra deposits: bulk glass and single shard  
1594 analysis. *Global and Planetary Change* 21, 151–171, 1999.
- 1595 Pearce, N.J., Westgate, J.A., Perkins, W.T., and Wade, S.C.: Trace-element microanalysis by LA-ICP-MS: the  
1596 quest for comprehensive chemical characterisation of single, sub-10-µm volcanic glass shards. *Quaternary*  
1597 *International* 246, 57–81, 2011.
- 1598 Pearce, N.J.G., Abbott, P.M., and Martin-Jones, C.M.: Microbeam methods for the analysis of glass in fine  
1599 grained tephra deposits: a SMART perspective on current and future trends. Geological Society, London,  
1600 Special Publications 398, 29–46, 2014.
- 1601 Pearce, N.J.G., Westgate, J.A., Gualda, G.A.R., Gatti, E., and Muhammad, R.F.: Tephra glass chemistry  
1602 provides storage and discharge details of five magma reservoirs which fed the 75 ka Youngest Toba Tuff  
1603 eruption, northern Sumatra. *Journal of Quaternary Science* 35, 256–271, 2020.
- 1604 Persson C.: Försök till tefroönologisk datering av några svenska torvmossar. *Geologiska Föreningen*  
1605 *iStockholm Förhandlingar* 88(3), 361–394, doi: 10.1080/11035896609448933, 1966.
- 1606 Persson C.: Tephrochronological investigation of peat deposits in Scandinavia and on the Faroe Islands.  
1607 Geological Survey of Sweden C 656, 1–34, 1971.



- 1608 Pilcher, J. and Hall, V.A.: Towards a tephrochronology for the Holocene of the north of Ireland. *The*  
 1609 *Holocene* 2, 255–259, 1992.
- 1610 Pilcher, J. and Hall, V.A.: Tephrochronological studies in northern England. *The Holocene* 6, 100–105, 1996.
- 1611 Pilcher, J.R., Hall, V.A., and McCormac, F.G.: Dates of Holocene Icelandic volcanic-eruptions from tephra  
 1612 layers in Irish peats. *The Holocene* 5, 103–110, 1995.
- 1613 Platz, T., Cronin, S.J., Smith, I.E.M., Turner, M.B., and Stewart, R.B.: Improving the reliability of  
 1614 microprobe-based analyses of andesitic glasses for tephra correlation. *The Holocene* 17, 573–583, 2007.
- 1615 Plunkett, G., Pilcher, J., Baillie, M., McClung, L.C.: Obituary – Emerita Professor Valerie Anne Hall BSc  
 1616 PhD FSA FHEA (1946–2016). *Quaternary Geochronology* 40, 8–11, 2017.
- 1617 Ponomareva, V., Portnyagin, M., and Davies, S.: Tephra without borders: far-reaching clues into past  
 1618 explosive eruptions. *Frontiers in Earth Sciences* 3: article 83, doi: org/10.3389/feart.2015.00083, 2015.
- 1619 Portnyagin, M. V., Ponomareva, V.V., Zelenin, E.A., Bazanova, L.I., Pevzner, M.M., Plechova, A.A.,  
 1620 Rogozin, A.N., and Garbe-Schönberg, D.: TephraKam: geochemical database of glass compositions in  
 1621 tephra and welded tuffs from the Kamchatka volcanic arc (northwestern Pacific). *Earth System Science*  
 1622 *Data*, 12, 469–486, 2020.
- 1623 Porter, S.: INQUA and Quaternary science at the Millennium: a personal retrospective. *Quaternary*  
 1624 *International* 62, 111–117, 1999.
- 1625 Preece, S.J., Westgate, J.A., Froese, D.G., Pearce, N.J.G., Perkins, W.T.: A catalogue of late Cenozoic tephra  
 1626 beds in the Klondike goldfields and adjacent areas, Yukon Territory. *Canadian Journal of Earth*  
 1627 *Sciences* 48, 1386–1418, 2011.
- 1628 Riede, F. and Thastrup, M.D.: Tephra, tephrochronology and archaeology – a (re-)view from northern Europe.  
 1629 *Heritage Science* 1 (15), 1–17, 2013.
- 1630 Riede, F., Bazely, O., Newton, A.J., and Lane, C.S.: A Laacher See-eruption supplement to Tephabase:  
 1631 investigating distal tephra fallout dynamics. *Quaternary International* 246, 134–144, 2011.
- 1632 Romero, J.E., Alloway, B.V., Gutiérrez, R., Bertin, D., Castruccio, A., Villarosa, G., Schipper, C.I., and 10  
 1633 others: Centennial-scale eruptive diversity at Volcán Calbuco (41.3°S; Northwest Patagonia) deduced from  
 1634 historic tephra cover-bed and dendrochronologic archives. *Journal of Volcanology and Geothermal Research*  
 1635 417, 107281, 2021.
- 1636 Ross, C.S. and Smith, R.L.: Ash-flow tuffs: their origin, geologic relations, and identification. A. study of the  
 1637 emplacement, by flowage, of hot gas-emitting volcanic ash; its induration by welding and crystallization,  
 1638 and criteria for recognizing the resulting rock. U.S. Geological Survey Professional Paper 366, 1–80, 1961.
- 1639 Royal Geographical Society: Obituary Sigurdur Thórarinnsson, 1912–1983. *The Geographical Journal* 149,  
 1640 405–406, 1983.
- 1641 Saito, Y., Okumura, K., Suzuki, T., Yokoyama, Y., and Izuho, M. (editors): Japanese Quaternary studies.  
 1642 *Quaternary International* 397, 1–588, 2016.



- 1643 Sarna-Wojcicki, A.M.: Tephrochronology, in: Quaternary Geochronology: Methods and Applications, edited  
1644 by Noller, J.S., Sowers, J.M., and Lettis, W.R., AGU Reference Shelf, 4, American Geophysical Union,  
1645 Washington, DC, 357–377, 2000.
- 1646 Schmid, R.: Descriptive nomenclature and classification of pyroclastic deposits and fragments:  
1647 recommendations of the IUGS Subcommittee on the Systematics of Igneous Rocks. *Geology* 9, 41–43,  
1648 1981.
- 1649 Schminck, H.-U.: IAVCEI: who we are and what we do. *Bulletin of Volcanology* 51, 229–242, 1989.
- 1650 Scott, J.M.: Introduction to the special issue on volcanism in Zealandia and the SW Pacific. *New Zealand*  
1651 *Journal of Geology and Geophysics* 64 (2/3), 147–152.
- 1652 Self, S. and Sparks, R.S.J.: Dedication, in: *Tephra Studies*, edited by Self, S. and Sparks, R.S.J., D. Reidel,  
1653 Dordrecht, xi–xii, 1981a.
- 1654 Self, S. and Sparks, R.S.J.: Preface, in: *Tephra Studies*, edited by Self, S. and Sparks, R.S.J., D. Reidel,  
1655 Dordrecht, xiii–xiv, 1981b.
- 1656 Self, S. and Sparks, R.S.J. (editors): *Tephra Studies*. D. Reidel, Dordrecht. 481 pp, 1981c.
- 1657 Self, S. and Sparks, R.S.J.: George Patrick Leonard Walker 2 March 1926–17 January 2005. *Biographical*  
1658 *Memoirs of Fellows of the Royal Society* 52, 423–436, 2006.
- 1659 Shane, P.A.R.: Tephrochronology: a New Zealand case study. *Earth-science Reviews* 49, 223–259, 2000.
- 1660 Shulmeister, J., Turney, C.S.M., Fink, D., Newnham, R.M., Alloway, B.V.: Developing an event stratigraphy  
1661 for Australasian climate change. *EOS* 87 (29), 283, 2006.
- 1662 Slate, J.L. and Knott, J.R.: Tephrochronology: an appreciation of the contributions of Andrei Sarna-Wojcicki.  
1663 *Quaternary International* 178, 10, 2008.
- 1664 Smalley, I.J.: Volcanic ash southern style. *Nature* 286, 841, 1980.
- 1665 Smalley, I.J.: Notes for a history of INQUA – the International Union for Quaternary Research. Giotto Loess  
1666 Research Group, Nottingham Trent University, Nottingham, U.K.,  
1667 [https://www.researchgate.net/publication/299976916\\_Notes\\_for\\_a\\_History\\_of\\_INQUA](https://www.researchgate.net/publication/299976916_Notes_for_a_History_of_INQUA), 2011.
- 1668 Smalley, I. and O’Hara-Dhand, K.: The Western Pacific Working Group of the INQUA Loess Commission:  
1669 expansion from central Europe. *Central European Journal of Geosciences* 2, 9–14, 2010.
- 1670 Smith, I.E.M. (editor): Late Cenozoic volcanism in New Zealand. *Royal Society of New Zealand Bulletin* 23,  
1671 371 pp., 1986.
- 1672 Smith, D.G.W. and Westgate, J.A.: Electron probe technique for characterising pyroclastic deposits. *Earth and*  
1673 *Planetary Science Letters* 5, 313–319, 1969.
- 1674 Smith, V.C., Shane, P.A.R., and Nairn, I.A.: Trends in rhyolite geochemistry, mineralogy, and magma storage  
1675 during the last 50 kyr at Okataina and Taupo volcanic centres, Taupo Volcanic Zone, New Zealand.  
1676 *Journal of Volcanology and Geothermal Research* 148, 372–406, 2005.
- 1677 Smith, V.C., Staff, R.A., Blockley, S.P.E., Bronk Ramsey, C., Nakagawa, T., Mark, D.F., Tekemura, K.,  
1678 Danhara, T., and Suigetsu 2006 Project Members: Identification and correlation of visible tephra in the





- 1679 Lake Suigetsu SG06 sedimentary archive, Japan: chronostratigraphic markers for synchronising of east  
1680 Asian/west Pacific palaeoclimatic records across the last 150 ka. *Quaternary Science Reviews* 67, 121–  
1681 137, 2013.
- 1682 Sparks, R.S.J., Self, S., Walker, G.P.L.: Products of ignimbrite eruptions. *Geology* 1, 115–118, 1973.
- 1683 Steen-McIntyre, V.: INQUA tephrochronology bibliography – a call for references. *EOS* 52 (7), 520, 1971.
- 1684 Steinthórsson, S.: Memorial to Sigurdur Thórarinnsson, 1912–1983. *Geological Society of America Memorials*  
1685 15, 1–6, 1985.
- 1686 Steinthórsson, S.: Sigurdur Thórarinnsson (1912–1983). *Jökull* 62, 3–20, 2012.
- 1687 Suzuki, T.: Chemical analysis of volcanic glass by energy dispersive X-ray spectrometry with Jeol JED-2001  
1688 and JSM-5200: analytical procedures and application. *Geographical Reports of Tokyo Metropolitan*  
1689 *University* 31, 27–36, 1996.
- 1690 Suzuki, T.: Tephra studies on Quaternary explosive eruptions in the Japanese islands. *The Quaternary*  
1691 *Research (Daiyonki-Kenkyu)* 46, 283–292, 2007.
- 1692 Suzuki, T. and Nakamura, Y.: Report on the COT-J symposium [13–15 March, 2005] entitled ‘Reconstruction  
1693 of development of Kanto tectonic basin: tephrochronology, underground geology and  
1694 tectonics’. *Quaternary Research (QR) Newsletter* 12 (3), 19–21, 2005.
- 1695 Suzuki, T., Moriwaki, H., and Lowe, D.J.: Hiroshi Machida – respected tephrochronologist, teacher, leader.  
1696 *Quaternary International* 246, 6–13, 2011.
- 1697 Suzuki, T., Kasahara, A., Nishizawa, F., Saito, H.: Chemical characterization of volcanic glass shards by  
1698 energy dispersive X-ray spectrometry with EDAX Genesis APEX2 and JEOL JSM-6390. *Geographical*  
1699 *Reports of Tokyo Metropolitan University* 49, 1–12, 2014.
- 1700 Swindles, G.T., Lawson, I.T., Savov, I.P., Connor, C.B., and Plunkett, G.: A 7000-yr perspective on volcanic  
1701 ash clouds affecting Northern Europe. *Geology* 39, 887–890, 2011.
- 1702 Swindles, G.T., Outram, Z., Batt, C.M., Hamilton, W.D., Church, M.J., Bond, J.M., Watson, E.J., Cook, G.T.,  
1703 Sim, T.G., Newton, A.J., Dugmore, A.J.: Vikings, peat formation and settlement abandonment: a  
1704 multimethod chronological approach from Shetland. *Quaternary Science Reviews* 210, 211–225, 2019.
- 1705 Tatsumi, Y. and Suzuki-Kamata, K.: Cause and risk of catastrophic eruptions in the Japanese archipelago.  
1706 *Proceedings of the Japan Academy, Series B, Physical and Biological Sciences* 90, 347–352, 2014.
- 1707 Thomas, D. and Lamothe, M.: Dr Stephen Stokes, 1964–2014,  
1708 <https://www.geog.ox.ac.uk/news/articles/140520-stokes.html>, 2014.
- 1709 Thompson, P.I.J., Dugmore, A.J., Newton, A.J., Streeter, R.J., and Cutler, N.A.: Variations in tephra  
1710 stratigraphy created by small-scale surface features in sub-polar landscapes. *Boreas*,  
1711 <https://doi.org/10.1111/bor.12557>, 2021.
- 1712 Thórarinnsson, S.: Tefrokronologiska studier på Island. *Geografiska Annaler* 26, 1–217, 1944.

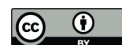

- 1713 Thórarinnsson, S.: The tephra-fall from Hekla on March 29<sup>th</sup>, 1947, in: The Eruption of Hekla 1947–1948,  
1714 edited by Einarsson, T., Kjartansson, G., and Thórarinnsson, S., The Icelandic Science Association and the  
1715 Museum of Natural History, Reykjavík, 2(3), 1–68, 1954.
- 1716 Thórarinnsson, S.: A message sent from Dr Thórarinnsson [in 1961], pp. 784–785 in Kobayashi, K. Report on  
1717 the VI<sup>th</sup> International Congress on Quaternary, Warsaw 1, 781–789, 1965.
- 1718 Thórarinnsson, S.: Ignimbrit í Thorsmörk. Náttúrufræðingurinn 39, 139–155, 1969.
- 1719 Thórarinnsson, S.: The terms *Tephra* and *Tephrochronology*, in “The World Bibliography and Index of  
1720 Quaternary Tephrochronology” edited by Westgate, J.A. and Gold, C.M. University of Alberta, Alberta,  
1721 Canada, xvii–xviii, 1974.
- 1722 Thórarinnsson, S.: Tephra studies and tephrochronology: a historical review with special reference to Iceland,  
1723 in: Tephra Studies, edited by Self, S. and Sparks, R.S.J., D. Reidel, Dordrecht, 1–12, 1981.
- 1724 Tomlinson, E.L., Smith, V.C., Albert, P.G., Aydar, E., Civetta, L., Cioni, R., Çubukçu, E., Gertisser, R., Isaia,  
1725 R., Menzies, M.A., Orsi, G., Rosi, M., and Zanchetta, G.: The major and trace element glass compositions  
1726 of the productive Mediterranean volcanic sources: tools for correlating distal tephra layers in and around  
1727 Europe. Quaternary Science Reviews 118, 48–66, 2015.
- 1728 Tonkin, P.J. and multiple authors: Obituary – A memorial to Colin George Vucetich BAgSc (Lincoln), born  
1729 6<sup>th</sup> October 1918–died 25 April 2007. New Zealand Soil News 55 (3), 96–101, 2007.
- 1730 Turney, C.S.M.: Extraction of rhyolitic ash from minerogenic lake sediments. Journal of Paleolimnology 19,  
1731 199–206, 1998.
- 1732 Turney, C.S.M., Davies, S.M., and Alloway, B.V.: Developing regional tephrochronological frameworks for  
1733 testing hypotheses of synchronous climate change. Past Global Changes (PAGES) 13(3), 16–17, 2004a.
- 1734 Turney, C.S.M., Lowe, J.J., Davies, S.M., Hall, V.A., Lowe, D.J., Wastegård, S., Hoek, W.Z., and Alloway,  
1735 B.V.: Tephrochronology of Last Termination sequences in Europe: a protocol for improved analytical  
1736 precision and robust correlation procedures (SCOTAV–INTIMATE proposal). Journal of Quaternary  
1737 Science 19, 111–120, 2004b.
- 1738 van den Bogaard, C. and Schmincke, H.-U.: Linking the North Atlantic to central Europe: a high resolution  
1739 tephrochronological record from northern Germany. Journal of Quaternary Science 17, 3–20, 2002.
- 1740 van den Bogaard, C., Dörfler, W., Sandgren, P., and Schmincke, H.-U.: Correlating the Holocene records:  
1741 Icelandic tephra found in Schleswig-Holstein (northern Germany). Naturwissenschaften 81, 554–556,  
1742 1994.
- 1743 van der Bilt, W.G.M., Lane, C.S., and Bakke, J.: Ultra-distal Kamchatkan ash on Arctic Svalbard: towards  
1744 hemispheric cryptotephra correlation. Quaternary Science Reviews 164, 230–235, 2017.
- 1745 Vucetich, C.G.: Obituary – Dr. William Alexander [Alan] Pullar, BSc, AOSM, DSc, FNZIAS. New Zealand  
1746 Soil News 30, 186–188, 1982.
- 1747 Waitt, R.B. and Begét, J.E.: Volcanic processes and geology of Augustine Volcano, Alaska. U.S. Geological  
1748 Survey Professional Paper 1762, 1–78, 2009.



- 1749 Wallace, K.L., Bursik, M.I., Goring, S.J., Kodama, S., Kuehn, S.C., Kurbatov, A., Lehnert, K., Profeta,  
1750 Ramdeen, S., Wallace, K., and Walker, J.D.: Improving discoverability of tephra data through  
1751 development of data upload templates and collection tools using community-driven best practices  
1752 recommendations. Goldschmidt Meeting, July 4-9,  
1753 <https://2021.goldschmidt.info/goldschmidt/2021/meetingapp.cgi/Paper/3629>, 2021.
- 1754 Wallace, K., Bursik, M., Kuehn, S., Kurbatov, A., Abbott, P., Bonadonna, C., Cashman, K., Davies, S.,  
1755 Jensen, B., Lane, C., Plunkett, G., Smith, V., Tomlinson, E., Thordarsson, T., and Walker, J.D.:  
1756 Community established best practice recommendations for tephra studies – from collection through  
1757 analysis. Nature Scientific Data [manuscript SDATA-21-00892: submitted 5-August-2021], in review.
- 1758 Wastegård, S. and Boygle, J.: Distal tephrochronology of NW Europe: the view from Sweden. *Jökull* 62,  
1759 73–80, 2012.
- 1760 Wastegård, S. and Davies, S.M.: An overview of distal tephrochronology in northern Europe during the last  
1761 1000 years. *Journal of Quaternary Science* 25, 500–512, 2009.
- 1762 Westgate, J.A.: Preface and acknowledgements, in: *World Bibliography and Index of Quaternary*  
1763 *Tephrochronology*, compiled by Westgate, J.A. and Gold, C.M., University of Alberta, Edmonton,  
1764 UNESCO and INQUA, iii–iv, 1974.
- 1765 Westgate, J.A. and Gold, C.M. (compilers): *World Bibliography and Index of Quaternary Tephrochronology*.  
1766 University of Alberta, Edmonton, UNESCO and INQUA, 528 pp, 1974.
- 1767 Westgate, J.A., Gorton, M.P.: Correlation techniques in tephra studies, in: *Tephra Studies*, edited by Self, S.  
1768 and Sparks, R.S.J., D. Reidel, Dordrecht, 73–94, 1981.
- 1769 Westgate, J.A., Walter, R., and Naeser, N.: Preface [to ‘Tephrochronology: stratigraphic applications of  
1770 tephra’], *Quaternary International* 13-14, 5, 1992a.
- 1771 Westgate, J.A., Walter, R., and Naeser, N. (editors): *Tephrochronology: stratigraphic applications of tephra*.  
1772 *Quaternary International* 13-14, 1–203, 1992b.
- 1773 Westgate, J.A., Perkins, W.T., Fuge, R., Pearce, N.J.G., and Wintle, A.G.: Trace-element analysis of volcanic  
1774 glass shards by laser ablation inductively coupled plasma mass spectrometry: application to  
1775 tephrochronological studies. *Applied Geochemistry* 9, 323–335, 1994.
- 1776 Wilson, C.J.N.: Post-conference Tour Day 1: Hamilton-Tokaanu, in: *Intra-conference and Post-conference*  
1777 *Tour Guides*, International Inter-INQUA Field Conference on Tephrochronology, Loess, and  
1778 Paleopedology, edited by Lowe, D.J., University of Waikato, Hamilton, New Zealand, 74–100, 1994.
- 1779 Wilson, C.J.N.: George Walker 1926-2005. *Geological Society of New Zealand Newsletter* 136, 47–50, 2005.
- 1780 WoldeGabriel, G., Hart, W.K., Heiken, G.: Innovative tephra studies in the East African Rift System. *EOS* 86  
1781 (27), 255, 2005.
- 1782 Wright, J.V., Smith, A.L., and Self, S.: A terminology for pyroclastic deposits, in: *Tephra Studies*, edited by  
1783 Self, S. and Sparks, R.S.J., D. Reidel, Dordrecht, 457–463, 1981.



1784 Wulf, S., Hardiman, M.J., Staff, R.A., Koutsodendris, A., Appelt, O., Blockley, S.P.E., Lowe, J.J., Manning,  
1785 C.J., Ottolini, L., Schmitt, A.K., Smith, V.C., Tomlinson, E.L., Vakhrameeva, P., Knipping, M., Kotthoff,  
1786 U., Milner, A.M., Müller, U.C., Christanis, K., Kalaitzidis, S., Tzedakis, P.C., Schmiedl, G., and Pross, J.:  
1787 The marine isotope stage 1–5 cryptotephra record of Tenaghi Philippon, Greece: towards a detailed  
1788 tephrostratigraphic framework for the eastern Mediterranean region. Quaternary Science Reviews 186,  
1789 236–262, 2018.  
1790  
1791



## 1792 Appendix A

1793 Named persons in selected group photos. Anon. = anonymous

1794 **Fig. 4 (lower)** Participants in the field on 4 December, 1993, near Haruna volcano, northern Kanto, Japan,  
 1795 during the PAGES/INQUA-COT workshop on the climatic impact of explosive volcanism. Photo: anon.

1796 *Standing at back* (from left): Fusao Arai, Hiroshi Machida, Takehiko Mikami, David Pyle, Tom Simkin, Janice  
 1797 Lough, David Lowe, James Begét, Greg Zielinski, Katherine Hirschboeck, Haraldur Sigurdsson, Tsutomu Soda,  
 1798 Takeshi Noto, Nat Rutter, Koji Okumura.

1799 *Crouching in front* (from left): (anon), Makiko Watanabe, Takehiko Suzuki, Suzanne Leroy, Valerie Hall,  
 1800 Hiroshi Moriwaki, Takaaki Fukuoka, Sumiko Kubo, Mika Kohno, Tatsuo Sweda, Kunihiko Endo, Shinji  
 1801 Nagaoka. Photo: anon.

1802

1803 **Fig. 5 (upper)** Participants in the integrative triple-discipline (tephra-loess-paleosols) meeting at University of  
 1804 Waikato, Hamilton, New Zealand, photographed on 8 February, 1994. Photo: Ross Clayton (University of  
 1805 Waikato).

1806 *Standing at back* (from left): Takehiko Suzuki, Hiroshi Moriwaki, Sue Donoghue, Brent Alloway, John  
 1807 Westgate, Dennis Eden, Amanjit Sandhu, Yoshitaka Nagatomo, Keiji Takemura, Liping Zhou, Akira  
 1808 Hayashida, Étienne Juvigné, (anon), Jun'ichi Kimura, John Bruce, James Begét, Kotaro Yamagata

1809 *Standing* (from left): Roma Lane, David Manning, John Hunt, Shane Cronin, Peter Almond, Alan Palmer, Takuo  
 1810 Yokoyama, Yoshinaga Shuichiro, Gordon Curry, Ken Verosub, Colin Vucetich, Margaret Vucetich, Carolyn  
 1811 Olson, Michael Singer, Takashi Sase, (anon), Richard Hay, Peter Kamp

1812 *Seated* (from left): Hiroshi Machida, Jiaqi Liu, Carol Smith, Alan Hull, Colin Wilson, Milan Pavich, Brad  
 1813 Pillans, Glenn Berger, Liddy Bakker, David Lowe, Phil Tonkin, Kerry Stevens, Bernd Strieweski, Graham  
 1814 Shepherd, John Catt, Janet Slate

1815 *Crouching in front* (from left): Benny Theng, Arno Kleber, Jim Dahm, Roger Briggs, Peter Hodder, Tim Naish,  
 1816 Michael Green, Mike Vennard, Denis-Didier Rousseau, Andrew Hammond

1817

1818 **Figure 7 (Upper)** Participants in the 2005 'Tephra Rush' meeting on 3 August, 2005, in Dawson City, Yukon  
 1819 Territory, Canada (from Froese et al., 2008a, p. 2). Photo: Brent Alloway.

1820 *Standing in arc around the back* (from left): Hiroshi Machida, Takaaki Fukuoka, David Lowe, Roland Gehrels,  
 1821 (anon), Stefan Wastegård, Warren Huff, Phil Shane, James Riehle, (anon), (anon), (anon), John Westgate

1822 *Seated directly in front of back row* (from left): Hiroshi Moriwaki, (anon), (anon), Siwan Davies, Brad Pillans,  
 1823 (anon), (anon)

1824 *Seated second row from front* (from left): Shari Preece, Takehiko Suzuki, Paul Matheus, (anon), Nick Pearce,  
 1825 Duane Froese

1826 *Seated front row* (from left): Kaori Aoki, (anon), James Begét, Maria Gehrels, Brent Alloway, Caitlin Buck,  
 1827 Britta Jensen, Grant Heiken

1828

1829

1830
